# Supplementary material
Source: PubMed Central journal article supplement (PMC2667946)
Supplement: NIHMS99991-supplement-Supp.pdf [file NIHMS99991-supplement-Supp.pdf]

# PROTEOMICS

## Supporting Information for Proteomics

**DOI 10.1002/pmic.200800385**

Sarah Dunn Keene, Todd M. Greco, Ioannis Parastatidis,  
Seon-Hwa Lee, Ethan G. Hughes, Rita J. Balice-Gordon,  
David W. Speicher and Harry Ischiropoulos

**Mass spectrometric and computational analysis of cytokine-induced  
alterations in the astrocyte secretome**

## Supporting Information

A

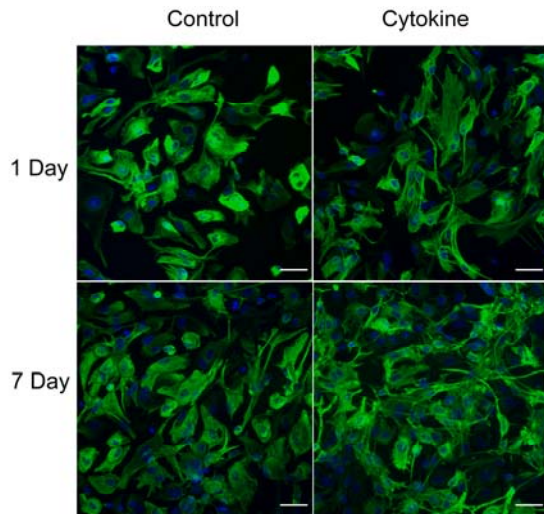

B

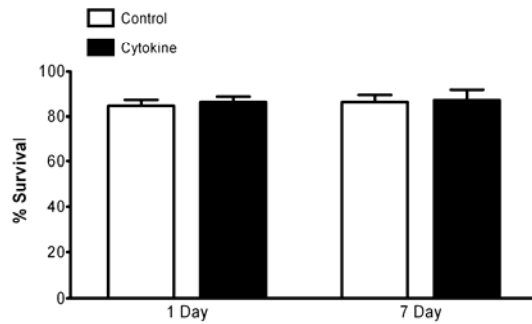

**Figure 1.** Characterization of primary murine astrocyte cell cultures. (A) Immunohistochemical (IHC) staining for glial fibrillary acidic protein (GFAP) and DAPI. (B) Cell viability measured via flow cytometry (see Experimental Procedures). Minimum event count 20,000 cells per condition (N = 4).

A

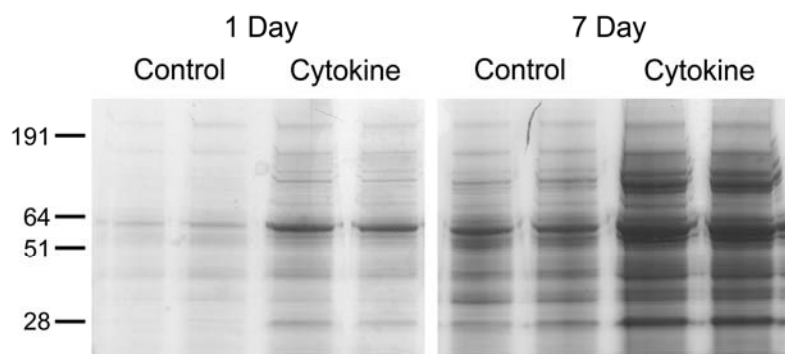

B

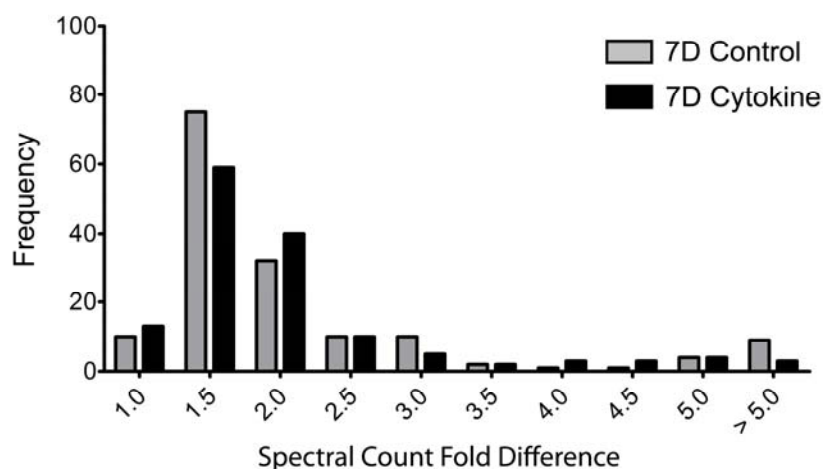

**Figure 2.** Reproducibility of Gel/LC-MS/MS. (A) ACM protein fraction from biological duplicates were resolved for 2 cm by 1D-SDS-PAGE and visualized with Colloidal Blue. Biological duplicates show similar protein staining patterns. Increased total protein in ACM is observed after cytokine stimulation and after 7 days *in vitro*. (B) Frequency versus spectral count fold difference calculated for secreted proteins identified in biological duplicates from 7D control (gray bars) and 7D cytokine (black bars). Most of the proteins' spectral counts differed by less than 2.5-fold between biological duplicates. This fold difference was selected as the minimum criteria when evaluating cytokine-induced alterations in relative protein abundance between control and cytokine conditions.

**Table 1.** Unique peptides from unclassified proteins after computational analysis

| Protein Name (Synonym)                           | Accession <sup>A</sup> | MW (kDa) | Unique Peptides <sup>B</sup> |             |            |             |
|--------------------------------------------------|------------------------|----------|------------------------------|-------------|------------|-------------|
|                                                  |                        |          | 1D Control                   | 1D Cytokine | 7D Control | 7D Cytokine |
| 14-3-3 protein beta                              | Q9CQV8                 | 28,086   | 4                            | 4           | 6          | 5           |
| 14-3-3 protein epsilon                           | P62259                 | 29,174   | 11                           | 8           | 12         | 8           |
| 14-3-3 protein eta                               | P68510                 | 28,212   | 3                            | 2           | -          | 2           |
| 14-3-3 protein gamma                             | P61982                 | 28,303   | 4                            | 4           | 6          | 3           |
| 14-3-3 protein theta                             | P68254                 | 27,778   | 3                            | 4           | 8          | 4           |
| 14-3-3 protein zeta                              | P63101                 | 27,771   | 7                            | 8           | 8          | 6           |
| Actin related protein 2/3 complex, subunit 2     | Q9CVB6                 | 34,357   | 2                            | 4           | 2          | 3           |
| Actinin, alpha 1                                 | Q7TPR4                 | 103,068  | 24                           | 24          | 39         | 8           |
| Actinin, alpha 4                                 | P57780                 | 104,977  | 6                            | 32          | 17         | 17          |
| Aldehyde dehydrogenase 1 family, member L1       | Q8R0Y6                 | 98,709   | -                            | 3           | 4          | -           |
| Aldo-keto reductase family 1, member A4          | Q9JII6                 | 36,587   | 4                            | 2           | 2          | 3           |
| Aldolase 1, isoform A                            | Q5FWB7                 | 39,356   | 4                            | 8           | 11         | 6           |
| Aldolase 3, isoform C                            | Q5SYM1                 | 39,395   | 2                            | 10          | 2          | 4           |
| Annexin A3                                       | O35639                 | 36,371   | 2                            | -           | 6          | -           |
| Annexin A5                                       | P48036                 | 35,752   | 5                            | 3           | 6          | 2           |
| Asparaginase like 1                              | Q8C0M9                 | 33,950   | 3                            | 4           | 4          | -           |
| Astrocytic phosphoprotein PEA-15                 | Q62048                 | 15,054   | -                            | 4           | 3          | 3           |
| Brain glycogen phosphorylase                     | Q8C194                 | 96,730   | -                            | 2           | 5          | -           |
| Calponin 3, acidic                               | Q9DAW9                 | 36,429   | -                            | -           | 2          | 2           |
| Clathrin, heavy polypeptide (Hc)                 | Q68FD5                 | 191,557  | 3                            | 14          | 6          | 4           |
| Cofilin 1, non-muscle                            | P18760                 | 18,560   | -                            | 5           | 5          | 4           |
| Creatine kinase, brain                           | Q04447                 | 42,713   | 9                            | 10          | 11         | 9           |
| Cytochrome c                                     | P62897                 | 11,605   | 3                            | 2           | 2          | 2           |
| Dihydropyrimidinase-like 2                       | O08553                 | 62,278   | 13                           | 12          | 12         | 5           |
| Dimethylarginine dimethylaminohydrolase 1        | Q9CWS0                 | 31,381   | 3                            | 5           | 3          | 2           |
| DJ-1 protein                                     | Q99LX0                 | 20,021   | 2                            | 3           | 3          | 3           |
| Enolase 1, alpha non-neuron                      | P17182                 | 47,141   | 7                            | 9           | 8          | 7           |
| Eukaryotic initiation factor 4AII                | P10630                 | 46,402   | -                            | 2           | 5          | 3           |
| Eukaryotic translation elongation factor 2       | P58252                 | 95,314   | 4                            | 4           | 5          | 3           |
| Eukaryotic translation initiation factor 5A      | P63242                 | 16,303   | -                            | 2           | 2          | 3           |
| Fatty acid binding protein 7, brain              | P51880                 | 14,893   | 3                            | 4           | 4          | 2           |
| Fatty acid synthase                              | P19096                 | 272,428  | -                            | 5           | 3          | 2           |
| Ferritin heavy chain 1                           | P09528                 | 21,067   | -                            | 2           | 4          | 4           |
| Ferritin light chain 1                           | P29391                 | 20,802   | 4                            | 2           | 5          | 6           |
| Filamin-A                                        | Q8BTM8                 | 281,194  | 9                            | 23          | 26         | 15          |
| Filamin-B                                        | Q80X90                 | 277,753  | 22                           | 29          | 27         | 25          |
| Filamin-C                                        | Q8VHX6                 | 291,119  | -                            | -           | 8          | 2           |
| Gelsolin-like capping protein                    | Q99LB4                 | 38,769   | -                            | -           | 2          | 4           |
| Glial fibrillary acidic protein (GFAP)           | P03995                 | 46,492   | 11                           | 9           | 12         | 12          |
| Glutathione S-transferase, alpha 4               | P24472                 | 25,564   | 3                            | 2           | 3          | 2           |
| Glutathione S-transferase, mu 1                  | A2AE90                 | 25,970   | 11                           | 10          | 12         | 10          |
| Glutathione S-transferase, mu 5                  | P48774                 | 26,635   | -                            | 3           | 3          | -           |
| Glutathione S-transferase, pi 2                  | P46425                 | 23,537   | -                            | -           | 5          | 4           |
| Glyceraldehyde-3-phosphate dehydrogenase (GAPDH) | P16858                 | 35,810   | -                            | -           | 2          | 4           |

|                                                                   |        |         |    |    |    |   |
|-------------------------------------------------------------------|--------|---------|----|----|----|---|
| Glyoxalase domain containing 4                                    | Q9CPV4 | 33,317  | -  | -  | 4  | - |
| Guanosine diphosphate (GDP) dissociation inhibitor 1              | P50396 | 50,522  | 2  | 3  | 5  | - |
| H4 histone family, member A                                       | P62806 | 11,367  | 3  | 5  | 2  | 3 |
| Heat shock 70kDa protein 8 isoform 1                              | P63017 | 70,871  | 7  | 16 | 13 | 5 |
| Heat shock protein 4                                              | Q5NCS5 | 94,209  | 5  | 6  | 7  |   |
| Heat shock protein 90kDa alpha (cytosolic), class A member 1      | P07901 | 84,788  | 6  | 6  | 13 | 9 |
| Heat shock protein 90kDa alpha (cytosolic), class B member 1      | Q71LX8 | 83,281  | 6  | 16 | 4  | 5 |
| Heterogeneous nuclear ribonucleoprotein A2/B1                     | O88569 | 37,403  | -  | 3  | 2  | 3 |
| Hypoxanthine guanine phosphoribosyl transferase 1                 | P00493 | 24,570  | -  | -  | 3  | - |
| Inositol monophosphatase                                          | O55023 | 30,436  | 3  | 2  | 3  | - |
| Isocitrate dehydrogenase [NADP] cytoplasmic                       | O88844 | 46,660  | 2  | 2  | 4  | - |
| Lactate dehydrogenase 1, A chain                                  | P06151 | 36,499  | 5  | 4  | 5  | 5 |
| Lactate dehydrogenase 2, B chain                                  | P16125 | 36,572  | 12 | 10 | 11 | 7 |
| Lactoylglutathione lyase                                          | Q9CPU0 | 20,810  | -  | 3  | 2  | 2 |
| Lamin A isoform A                                                 | P48678 | 74,238  | -  | -  | 3  | 2 |
| Leukotriene A4 hydrolase                                          | Q3UY71 | 69,051  | 2  | -  | 6  | - |
| Lysosomal alpha-mannosidase precursor (Mannosidase, alpha B)      | O09159 | 114,604 | 3  | 5  | 11 | 6 |
| Malate dehydrogenase 2, NAD (mitochondrial)                       | P08249 | 35,611  | 11 | 9  | 8  | 5 |
| Malate dehydrogenase, cytoplasmic                                 | P14152 | 36,511  | 7  | 3  | 6  | 5 |
| Malic enzyme 1, supernatant                                       | P06801 | 63,999  | -  | -  | 2  | 2 |
| Mannosidase alpha, class 1A, member 1                             | Q544T7 | 73,276  | 2  | 2  | 10 | 5 |
| Myosin, heavy polypeptide 9, non-muscle isoform 1                 | Q8VDD5 | 226,357 | -  | -  | 3  | - |
| Myosin, light polypeptide 6, alkali, smooth muscle and non-muscle | Q60605 | 16,930  | -  | 3  | 5  | 2 |
| Nestin                                                            | Q6P5H2 | 202,011 | -  | 7  | 4  | - |
| Nit protein 2                                                     | Q9JHW2 | 30,502  | -  | -  | 2  | - |
| Nucleoside-diphosphate kinase 1                                   | P15532 | 17,208  | 3  | -  | 4  | 4 |
| Nucleoside-diphosphate kinase 2                                   | Q01768 | 17,363  | 2  | 4  | 2  | 2 |
| Ornithine aminotransferase                                        | P29758 | 48,355  | -  | -  | 3  | 3 |
| Peroxiredoxin 1                                                   | A2AP16 | 22,176  | 4  | 6  | 7  | 6 |
| Peroxiredoxin 2 (Thioredoxin peroxidase 1)                        | Q61171 | 21,779  | 3  | 5  | 5  | 4 |
| Peroxiredoxin 5 precursor                                         | P99029 | 21,897  | 9  | 12 | 8  | 8 |
| Peroxiredoxin 6 (Acidic calcium-independent phospholipase A2)     | O08709 | 24,871  | -  | 2  | 4  | 7 |
| Phosphogluconate dehydrogenase                                    | Q91V28 | 53,261  | 4  | 4  | 5  | 2 |
| Phosphoglycerate kinase 1                                         | P09411 | 44,536  | 9  | 11 | 8  | 8 |
| Phosphoglycerate mutase 1 (brain)                                 | Q9DBJ1 | 28,832  | 3  | 3  | 7  | 5 |
| Phosphoserine aminotransferase 1                                  | Q99K85 | 40,473  | 7  | -  | 2  | - |
| Plectin 1                                                         | Q9QXS1 | 534,216 | -  | -  | 6  | - |
| Proteasome activator PA28 alpha subunit                           | P97371 | 28,673  | -  | -  | 3  | 4 |
| Proteasome subunit, alpha type 1                                  | Q9R1P4 | 29,547  | 3  | 2  | 3  | - |
| Proteasome subunit, alpha type 2                                  | P49722 | 25,926  | -  | 2  | 3  | - |
| Proteasome subunit, alpha type 3                                  | Q9DCD8 | 28,490  | 4  | 2  | 2  | - |
| Proteasome subunit, alpha type 5                                  | Q3UPK6 | 26,411  | 3  | 2  | 4  | - |
| Proteasome subunit, alpha type 6                                  | Q9QUM9 | 27,372  | 2  | 3  | 3  | 3 |
| Proteasome subunit, alpha type 7                                  | Q9Z2U0 | 27,855  | 6  | 4  | 5  | 4 |
| Proteasome subunit, beta type 1                                   | O09061 | 26,372  | 4  | -  | 4  | - |
| Proteasome subunit, beta type 3                                   | Q545G0 | 22,965  | 2  | 3  | 4  | - |
| Proteasome subunit, beta type 5                                   | Q3UZI1 | 28,532  | 3  | 7  | 4  | - |
| Proteasome subunit, beta type 8                                   | P28063 | 30,260  | 2  | 3  | 3  | - |
| Purine-nucleoside phosphorylase                                   | P23492 | 32,277  | 4  | -  | 5  | 4 |

|                                                                        |        |         |    |    |    |   |
|------------------------------------------------------------------------|--------|---------|----|----|----|---|
| Pyruvate kinase isozyme M2                                             | P52480 | 57,887  | 3  | 5  | 12 | 7 |
| Rho GDP dissociation inhibitor (GDI) alpha                             | Q99PT1 | 23,407  | 3  | 2  | 5  | 3 |
| Ribonuclease/angiogenesis inhibitor                                    | Q91VI7 | 49,816  | 5  | -  | 3  | 3 |
| S-adenosylhomocysteine hydrolase                                       | Q5M9P0 | 47,674  | 2  | -  | 2  | - |
| SH3-binding domain glutamic acid-rich protein like                     | Q9JJU8 | 12,811  | 2  | 3  | 4  | 4 |
| Soluble calcium-activated nucleotidase 1                               | Q8VCF1 | 45,653  | 2  | 2  | 4  | 3 |
| Spectrin alpha 2                                                       | P16546 | 284,597 | -  | 3  | 14 | - |
| Spectrin beta 2 isoform 1 or 2                                         | Q62261 | 274,223 | -  | 2  | 5  | - |
| S-phase kinase-associated protein 1A                                   | Q9WTX5 | 18,672  | -  | 3  | 3  | 2 |
| Superoxide dismutase 1, soluble                                        | P08228 | 15,943  | 4  | 4  | 4  | 5 |
| Thioredoxin reductase 1                                                | Q8CI31 | 54,337  | 3  | 3  | 2  | - |
| Transaldolase 1                                                        | Q93092 | 37,387  | 5  | -  | 3  | - |
| Transgelin                                                             | P37804 | 22,576  | 3  | 5  | 7  | 5 |
| Transgelin 2                                                           | Q91VU2 | 22,395  | 2  | 4  | 6  | 6 |
| Transitional endoplasmic reticulum ATPase (valosin-containing protein) | Q01853 | 89,364  | 14 | 23 | 14 | 4 |
| Transketolase                                                          | P40142 | 67,630  | -  | -  | 3  | - |
| Translin                                                               | Q62348 | 26,201  | 2  | -  | 4  | 2 |
| Triosephosphate isomerase 1                                            | P17751 | 26,713  | 6  | 4  | 4  | 2 |
| Tropomyosin 1, alpha                                                   | P58771 | 32,681  | 4  | 6  | 4  | 3 |
| Tropomyosin 4, alpha                                                   | Q6IRU2 | 28,468  | 5  | 3  | 6  | 2 |
| Tubulin, alpha                                                         | P05213 | 50,152  | -  | 4  | 5  | 2 |
| Tubulin, beta                                                          | Q9ERD7 | 50,419  | -  | 5  | 5  | - |
| Ubiquitin carboxy-terminal hydrolase L1                                | Q9R0P9 | 24,838  | 2  | 3  | 3  | 2 |
| Ubiquitin-activating enzyme E1, Chr X                                  | Q02053 | 117,809 | -  | 4  | 3  | 2 |
| UDP-glucose pyrophosphorylase 2                                        | Q91ZJ5 | 56,979  | 3  | 3  | 3  | - |
| Villin 2                                                               | P26040 | 69,407  | -  | -  | 5  | 4 |
| Vinculin                                                               | Q64727 | 116,717 | 11 | 17 | 19 | 6 |
| WD repeat domain 1                                                     | Q3TJY2 | 66,407  | 4  | 4  | 3  | - |

Proteins are reported with their corresponding accession number, molecular weight (MW), and unique peptides identified for each treatment condition.

<sup>A</sup>Accession numbers are reported from the Uniprot database ([www.uniprot.org](http://www.uniprot.org)) and, when available, refer to the unprocessed precursor protein.

<sup>B</sup>The average number of unique peptides identified after applying the selection criteria detailed in Experimental Procedures. A null value indicates the protein did not meet the minimum criteria for identification.

**Table 2.** Protein Prowler N-terminal signal peptide prediction

| <b>Protein Name (Synonym)</b>                                        | <b>Accession<sup>a</sup></b> | <b>SP<sup>b</sup></b> | <b>MTP<sup>c</sup></b> | <b>Other<sup>d</sup></b> |
|----------------------------------------------------------------------|------------------------------|-----------------------|------------------------|--------------------------|
| Acid ceramidase precursor (Acylsphingosine deacylase)                | Q9WV54                       | 0.99                  | 0                      | 0.01                     |
| Aminopeptidase (Plasma glutamate carboxypeptidase)                   | Q9WVJ3                       | 0.99                  | 0                      | 0.01                     |
| Carboxypeptidase E precursor                                         | Q00493                       | 0.99                  | 0                      | 0.01                     |
| Chemokine (C-X-C motif) ligand 1                                     | P12850                       | 0.99                  | 0                      | 0.01                     |
| Collagen alpha-1(XII) chain precursor                                | Q60847                       | 0.99                  | 0                      | 0.01                     |
| Extracellular matrix protein                                         | Q9QX30                       | 0.99                  | 0                      | 0.01                     |
| Growth-arrest-specific protein 6 precursor (GAS-6)                   | Q61362                       | 0.99                  | 0                      | 0.01                     |
| Lysosomal-associated membrane glycoprotein 1 (LAMP1)                 | P11438                       | 0.99                  | 0                      | 0.01                     |
| Metalloproteinase inhibitor 2 precursor (TIMP-2)                     | P25785                       | 0.99                  | 0                      | 0.01                     |
| Basement membrane-specific heparan sulfate proteoglycan core protein | Q05793                       | 0.99                  | 0                      | 0.01                     |
| SPARC precursor                                                      | Q5NBV5                       | 0.99                  | 0                      | 0.01                     |
| Plasma protease C1 inhibitor                                         | P97290                       | 0.99                  | 0                      | 0.01                     |
| 4632419I22Rik protein                                                | Q6GU68                       | 0.98                  | 0                      | 0.02                     |
| Alpha-N-acetylglucosaminidase                                        | O88325                       | 0.98                  | 0                      | 0.02                     |
| Amyloid beta A4 protein precursor (APP)                              | P12023                       | 0.98                  | 0                      | 0.02                     |
| Astrocytic phosphoprotein PEA-15                                     | Q62000                       | 0.98                  | 0                      | 0.02                     |
| Beta-2-microglobulin precursor                                       | P01887                       | 0.98                  | 0                      | 0.02                     |
| Beta-glucuronidase precursor                                         | P12265                       | 0.98                  | 0                      | 0.02                     |
| Bone morphogenetic protein 1                                         | P09581                       | 0.98                  | 0                      | 0.02                     |
| Cadherin-2 precursor (Neural-cadherin)                               | P15116                       | 0.98                  | 0                      | 0.01                     |
| Calreticulin precursor                                               | P14211                       | 0.98                  | 0                      | 0.02                     |
| Cathepsin B precursor                                                | P10605                       | 0.98                  | 0                      | 0.02                     |
| Cathepsin L precursor                                                | P06797                       | 0.98                  | 0                      | 0.02                     |
| CD109 antigen homolog precursor                                      | Q8R422                       | 0.98                  | 0.01                   | 0.02                     |
| Chemokine (C-C motif) ligand 7                                       | Q03366                       | 0.98                  | 0                      | 0.02                     |
| Chemokine (C-C motif) ligand 8                                       | Q9Z121                       | 0.98                  | 0                      | 0.02                     |
| Chemokine (C-X3-C motif) ligand 1                                    | O35188                       | 0.98                  | 0                      | 0.02                     |
| Clusterin precursor (Apolipoprotein J)                               | Q06890                       | 0.98                  | 0                      | 0.02                     |
| Collagen alpha-1(I) chain precursor                                  | P11087                       | 0.98                  | 0                      | 0.02                     |
| Collagen alpha-1(IV) chain precursor                                 | P02463                       | 0.98                  | 0                      | 0.02                     |
| Collagen alpha-1(VI) chain precursor                                 | Q04857                       | 0.98                  | 0                      | 0.02                     |
| Collagen alpha-2(I) chain precursor                                  | Q01149                       | 0.98                  | 0                      | 0.02                     |
| Macrophage colony-stimulating factor 1 receptor                      | Q6NXM5                       | 0.98                  | 0                      | 0.02                     |
| Complement C1q tumor necrosis factor-related protein 5 precursor     | Q8K479                       | 0.98                  | 0                      | 0.02                     |
| Complement C1s-A subcomponent                                        | Q8CG14                       | 0.98                  | 0                      | 0.02                     |
| Complement factor B precursor                                        | P04186                       | 0.98                  | 0                      | 0.02                     |
| Cyclophilin C-associated protein                                     | O35649                       | 0.98                  | 0                      | 0.02                     |
| Cystatin-C precursor (Cystatin-3)                                    | P21460                       | 0.98                  | 0                      | 0.02                     |
| Dipeptidyl-peptidase 1 precursor (Cathepsin C)                       | P97821                       | 0.98                  | 0                      | 0.02                     |
| Epididymal secretory protein E1 precursor                            | Q9Z0J0                       | 0.98                  | 0                      | 0.02                     |
| Epididymis-specific alpha-mannosidase precursor                      | O54782                       | 0.98                  | 0                      | 0.02                     |
| Fibromodulin precursor (FM)                                          | P50608                       | 0.98                  | 0                      | 0.02                     |
| Fibulin-5 precursor (FIBL-5)                                         | Q9WVH9                       | 0.98                  | 0                      | 0.02                     |
| Ganglioside GM2 activator precursor                                  | Q60648                       | 0.98                  | 0                      | 0.02                     |
| Glypican-4 precursor (K-glypican)                                    | P51655                       | 0.98                  | 0                      | 0.02                     |
| H-2 class I histocompatibility antigen, D-B alpha chain precursor    | P01899                       | 0.98                  | 0                      | 0.02                     |
| H-2 class I histocompatibility antigen, Q8 alpha chain               | P14430                       | 0.98                  | 0                      | 0.02                     |

|                                                                          |        |      |      |      |
|--------------------------------------------------------------------------|--------|------|------|------|
| Insulin-like growth factor-binding protein 5                             | Q07079 | 0.98 | 0    | 0.02 |
| Inter-alpha-trypsin inhibitor heavy chain H3 precursor                   | Q61704 | 0.98 | 0    | 0.02 |
| Legumain                                                                 | A2RTI3 | 0.98 | 0    | 0.02 |
| Lipopolysaccharide binding protein                                       | A2AC66 | 0.98 | 0    | 0.02 |
| Low-density lipoprotein receptor-related protein 1 precursor (A2MR)      | Q91ZX7 | 0.98 | 0    | 0.02 |
| Lysosomal protective protein precursor                                   | P16675 | 0.98 | 0    | 0.02 |
| Lysozyme C type M precursor                                              | P08905 | 0.98 | 0    | 0.02 |
| Cell adhesion molecule 4 precursor                                       | Q8R464 | 0.98 | 0    | 0.02 |
| mouse fat 1 cadherin                                                     | Q9QXA3 | 0.98 | 0    | 0.02 |
| Neutrophil gelatinase-associated lipocalin precursor (Lipocalin 2)       | P11672 | 0.98 | 0    | 0.02 |
| Phospholipid transfer protein precursor (Lipid transfer protein II)      | P55065 | 0.98 | 0    | 0.02 |
| Platelet-derived growth factor receptor-like protein precursor           | Q61147 | 0.98 | 0    | 0.02 |
| Procollagen, type XI, alpha 1                                            | P22777 | 0.98 | 0    | 0.02 |
| Procollagen-lysine, 2-oxoglutarate 5-dioxygenase 1 (Lysyl hydroxylase 1) | Q9R0E2 | 0.98 | 0    | 0.02 |
| protein disulfide isomerase associated 6                                 | Q922R8 | 0.98 | 0    | 0.02 |
| Retinoic acid receptor responder protein 2 precursor                     | Q9DD06 | 0.98 | 0    | 0.02 |
| Serotransferrin precursor (Transferrin)                                  | Q921I1 | 0.98 | 0    | 0.02 |
| Sulfated glycoprotein 1 precursor (Prosaposin)                           | Q61207 | 0.98 | 0    | 0.02 |
| Transcobalamin-2 precursor (Transcobalamin II)                           | O88968 | 0.98 | 0    | 0.02 |
| Acid sphingomyelinase-like phosphodiesterase 3a precursor                | P70158 | 0.97 | 0    | 0.03 |
| Apolipoprotein E precursor (Apo-E)                                       | P08226 | 0.97 | 0    | 0.03 |
| Cathepsin D precursor                                                    | P18242 | 0.97 | 0    | 0.03 |
| Collagen alpha-2(V) chain precursor                                      | Q3U962 | 0.97 | 0    | 0.03 |
| Complement C1q subcomponent subunit C precursor                          | Q640N1 | 0.97 | 0    | 0.03 |
| Complement C1r-A subcomponent                                            | Q8CG16 | 0.97 | 0    | 0.03 |
| Fibronectin 1                                                            | Q3UGY5 | 0.97 | 0.01 | 0.03 |
| Glia-derived nexin precursor (Serpine 2)                                 | Q07235 | 0.97 | 0    | 0.03 |
| Igfbp3 protein (Insulin-like growth factor binding protein 3)            | Q6PE55 | 0.97 | 0    | 0.03 |
| Insulin-like growth factor binding protein 7                             | Q61581 | 0.97 | 0    | 0.03 |
| Lysyl oxidase-like 3                                                     | Q91VN8 | 0.97 | 0    | 0.03 |
| Mini-agrin                                                               | Q5EBX5 | 0.97 | 0    | 0.03 |
| Monocyte differentiation antigen CD14 precursor                          | P10810 | 0.97 | 0    | 0.03 |
| Nidogen 2 protein                                                        | Q8R5G0 | 0.97 | 0    | 0.03 |
| Nucleobindin-1 precursor (CALNUC)                                        | Q02819 | 0.97 | 0    | 0.03 |
| Pentraxin-related protein PTX3 precursor                                 | P48759 | 0.97 | 0    | 0.03 |
| Platelet-activating factor acetylhydrolase                               | Q60963 | 0.97 | 0    | 0.02 |
| protein disulfide isomerase associated 4                                 | P08003 | 0.97 | 0    | 0.03 |
| Renin receptor precursor                                                 | Q9CYN9 | 0.97 | 0    | 0.03 |
| Ribonuclease T2 isoform 1                                                | Q9CQ01 | 0.97 | 0    | 0.03 |
| Secretogranin 3                                                          | Q8R1D7 | 0.97 | 0    | 0.03 |
| Tenascin precursor (TN-C)                                                | Q80YX1 | 0.97 | 0    | 0.03 |
| Complement C1q subcomponent subunit B precursor                          | P14106 | 0.96 | 0    | 0.04 |
| Complement C3 precursor                                                  | P01027 | 0.96 | 0    | 0.03 |
| Immunoglobulin superfamily containing leucine-rich repeat                | Q62356 | 0.96 | 0    | 0.04 |
| Laminin subunit alpha-4 precursor                                        | P97927 | 0.96 | 0    | 0.04 |
| Laminin subunit gamma-1 precursor (Laminin B2 chain)                     | P02468 | 0.96 | 0.01 | 0.04 |
| Mammalian ependymin related protein-2                                    | Q99M71 | 0.96 | 0    | 0.04 |
| Peptidyl-prolyl cis-trans isomerase B                                    | P24369 | 0.96 | 0    | 0.04 |
| Procollagen-lysine, 2-oxoglutarate 5-dioxygenase 3 (Lysyl hydroxylase 3) | Q9R0E1 | 0.96 | 0    | 0.04 |



|                                                                          |        |      |      |      |
|--------------------------------------------------------------------------|--------|------|------|------|
| Serine protease inhibitor A3N precursor (Serp1n A3N)                     | Q91WP6 | 0.96 | 0    | 0.04 |
| Superoxide dismutase, extracellular                                      | O09164 | 0.96 | 0    | 0.04 |
| Tenascin-N precursor (TN-N)                                              | Q80Z71 | 0.96 | 0    | 0.04 |
| Alpha-2-macroglobulin-P precursor (Alpha-2-macroglobulin)                | Q02105 | 0.95 | 0    | 0.04 |
| Beta-1,3-N-acetylglucosaminyltransferase lunatic fringe                  | O09010 | 0.95 | 0    | 0.05 |
| Biotinidase precursor                                                    | Q8CIF4 | 0.95 | 0    | 0.05 |
| Cathepsin S precursor                                                    | O70370 | 0.95 | 0.01 | 0.05 |
| EGF-containing fibulin-like extracellular matrix protein 2               | Q9JM06 | 0.95 | 0    | 0.05 |
| Insulin-like growth factor binding protein 2                             | P47877 | 0.95 | 0    | 0.04 |
| Calsyntenin 1                                                            | A2A800 | 0.94 | 0.02 | 0.04 |
| Inter-alpha-trypsin inhibitor heavy chain H5                             | Q8BJD1 | 0.94 | 0    | 0.06 |
| Ceruloplasmin                                                            | Q6NZM2 | 0.93 | 0    | 0.07 |
| Complement C4-B precursor                                                | P01029 | 0.93 | 0.01 | 0.06 |
| Sulfhydryl oxidase 1 precursor (Quiescin Q6)                             | Q8BND5 | 0.93 | 0.01 | 0.06 |
| Neurocan core protein precursor (Chondroitin sulfate proteoglycan 3)     | P55066 | 0.92 | 0    | 0.08 |
| Palmitoyl-protein thioesterase 1 precursor (PPT-1)                       | O88531 | 0.92 | 0.02 | 0.06 |
| N(4)-(beta-N-acetylglucosaminy1)-L-asparaginase                          | Q64191 | 0.91 | 0.01 | 0.08 |
| Lysosomal alpha-glucosidase precursor (Acid maltase)                     | P70699 | 0.91 | 0    | 0.09 |
| Chitinase-3-like protein 1 precursor (Cartilage glycoprotein 39)         | Q61292 | 0.9  | 0    | 0.1  |
| Cathepsin Z                                                              | Q9ES94 | 0.89 | 0.01 | 0.1  |
| Macrophage colony-stimulating factor 1 precursor (CSF-1)                 | P07141 | 0.89 | 0.02 | 0.09 |
| Thrombospondin 1                                                         | Q8CGB2 | 0.87 | 0    | 0.13 |
| Vacuolar ATP synthase subunit S1 precursor                               | Q9R1Q9 | 0.87 | 0.02 | 0.11 |
| Laminin subunit beta-2 precursor (S-laminin)                             | Q61245 | 0.86 | 0    | 0.13 |
| Pigment epithelium-derived factor (PEDF)                                 | P97298 | 0.84 | 0.02 | 0.14 |
| Galactocerebrosidase precursor (GALCERase)                               | P54818 | 0.83 | 0.03 | 0.14 |
| Vitamin K-dependent protein S precursor                                  | Q08761 | 0.83 | 0.02 | 0.15 |
| Endoplasmic precursor (GRP94)                                            | P08113 | 0.82 | 0.03 | 0.15 |
| Mimectan precursor (Osteoglycin)                                         | Q61592 | 0.81 | 0.03 | 0.16 |
| Follistatin-related protein 1 precursor                                  | Q6GQT1 | 0.8  | 0.02 | 0.17 |
| Putative phospholipase B-like 2 precursor                                | Q3TCN2 | 0.8  | 0.02 | 0.18 |
| Procollagen-lysine, 2-oxoglutarate 5-dioxygenase 2 (Lysyl hydroxylase 2) | Q9R0B9 | 0.8  | 0.01 | 0.2  |
| Beta-hexosaminidase beta chain precursor (Hexosaminidase B)              | P20060 | 0.77 | 0.04 | 0.19 |
| N-acetyllactosaminide beta-1,3-N-acetylglucosaminyltransferase           | Q8BWP8 | 0.77 | 0.02 | 0.22 |
| Tripeptidyl-peptidase 1 precursor                                        | O89023 | 0.77 | 0.01 | 0.22 |
| Protein disulfide-isomerase A3 precursor                                 | P27773 | 0.73 | 0.03 | 0.25 |
| Plasminogen activator inhibitor 1                                        | P47878 | 0.72 | 0.11 | 0.17 |
| Gamma-glutamyl hydrolase                                                 | Q9Z0L8 | 0.69 | 0.06 | 0.25 |
| Endoplasmic reticulum protein ERp29 precursor                            | P57759 | 0.67 | 0.06 | 0.28 |
| 45 kDa calcium-binding protein precursor (SDF-4)                         | Q61112 | 0.66 | 0.06 | 0.28 |
| N-acetylglucosamine-6-sulfatase precursor (G6S)                          | Q8BFR4 | 0.66 | 0.06 | 0.28 |
| Protein disulfide-isomerase precursor (PDI)                              | P09103 | 0.66 | 0.05 | 0.29 |
| Ptprz1 protein (DSD-1 Proteoglycan)                                      | B2RXS8 | 0.65 | 0.06 | 0.29 |
| Intercellular adhesion molecule                                          | Q922B3 | 0.65 | 0.06 | 0.29 |
| Stromelysin-1 precursor (MMP-3)                                          | P28862 | 0.63 | 0.05 | 0.32 |
| Aggrin                                                                   | A2ASQ0 | 0.61 | 0.04 | 0.35 |
| Exostosin-2                                                              | P70428 | 0.54 | 0.05 | 0.41 |
| SPARC-like protein 1 precursor (Matrix glycoprotein Sc1)                 | P70663 | 0.54 | 0.1  | 0.36 |
| 78 kDa glucose-regulated protein precursor                               | P20029 | 0.53 | 0.08 | 0.39 |

|                                                                            |        |      |      |      |
|----------------------------------------------------------------------------|--------|------|------|------|
| Beta-hexosaminidase alpha chain precursor (Hexosaminidase A)               | P29416 | 0.53 | 0.08 | 0.39 |
| Dipeptidyl-peptidase 2 precursor                                           | Q9ET22 | 0.52 | 0.1  | 0.38 |
| Sortilin-related receptor, LDLR class A repeats-containing                 | O88307 | 0.49 | 0.27 | 0.24 |
| Bifunctional heparan sulfate N-deacetylase/N-sulfotransferase 1; DAST-1    | Q3UHN9 | 0.48 | 0.09 | 0.42 |
| Lysosomal alpha-mannosidase precursor (Mannosidase, alpha B)               | O09159 | 0.44 | 0.05 | 0.51 |
| Laminin subunit alpha-5 precursor                                          | Q61001 | 0.42 | 0.03 | 0.55 |
| Vesicular integral-membrane protein VIP36 precursor                        | Q9DBH5 | 0.42 | 0.07 | 0.51 |
| Adipocyte enhancer-binding protein                                         | Q62165 | 0.41 | 0.11 | 0.48 |
| Meteorin, glial cell differentiation regulator-like                        | Q8VE43 | 0.38 | 0.12 | 0.5  |
| Plexin domain-containing protein 2 precursor                               | Q9DC11 | 0.31 | 0.07 | 0.62 |
| Phosphogluconate dehydrogenase                                             | Q91V28 | 0.29 | 0.01 | 0.7  |
| Vascular cell adhesion protein 1 precursor (V-CAM 1)                       | P29533 | 0.28 | 0.13 | 0.58 |
| Gelsolin precursor (Actin-depolymerizing factor)                           | P13020 | 0.27 | 0.14 | 0.59 |
| Mannosidase alpha, class 1A, member 1                                      | Q544T7 | 0.25 | 0.13 | 0.62 |
| Glutathione S-transferase, alpha 4                                         | P24472 | 0.21 | 0.11 | 0.68 |
| Galectin-3 (Galactose-specific lectin 3)                                   | P16110 | 0.19 | 0.09 | 0.72 |
| Ferritin light chain 1                                                     | P29391 | 0.17 | 0.08 | 0.76 |
| Intermediate filament protein nestin                                       | Q6P5H2 | 0.16 | 0.08 | 0.76 |
| Ca <sup>2+</sup> -dependent endoplasmic reticulum nucleoside diphosphatase | Q8VCF1 | 0.15 | 0.08 | 0.76 |
| Heat shock protein 90kDa alpha (cytosolic), class B member 1               | Q71LX8 | 0.14 | 0.09 | 0.76 |
| Ubiquitin carboxy-terminal hydrolase L1                                    | Q9R0P9 | 0.14 | 0.05 | 0.81 |
| Isocitrate dehydrogenase [NADP] cytoplasmic                                | O88844 | 0.11 | 0.08 | 0.8  |
| Heat shock protein 4                                                       | Q5NCS5 | 0.11 | 0.02 | 0.86 |
| Aminopeptidase puromycin sensitive                                         | Q5PR74 | 0.1  | 0.58 | 0.32 |
| Inositol monophosphatase                                                   | O55023 | 0.1  | 0.07 | 0.83 |
| Nit protein 2                                                              | Q9JHW2 | 0.1  | 0.1  | 0.8  |
| Vimentin                                                                   | P20152 | 0.09 | 0.38 | 0.53 |
| Malate dehydrogenase, cytoplasmic                                          | P14152 | 0.08 | 0.01 | 0.91 |
| S-adenosylhomocysteine hydrolase                                           | Q5M9P0 | 0.07 | 0.05 | 0.88 |
| Hypoxanthine guanine phosphoribosyl transferase 1                          | P00493 | 0.06 | 0.05 | 0.89 |
| Heat shock protein 90kDa alpha (cytosolic), class A member 1               | P07901 | 0.06 | 0.03 | 0.91 |
| Superoxide dismutase 1, soluble                                            | P08228 | 0.06 | 0.05 | 0.88 |
| Glutathione S-transferase, mu 5                                            | P48774 | 0.06 | 0.06 | 0.88 |
| Lactate dehydrogenase 1, A chain                                           | P06151 | 0.04 | 0.01 | 0.95 |
| Translin                                                                   | Q62348 | 0.04 | 0.01 | 0.96 |
| Asparaginase like 1                                                        | Q8C0M9 | 0.03 | 0.08 | 0.89 |
| Peroxioredoxin 6 (Acidic calcium-independent phospholipase A2)             | O08709 | 0.02 | 0.02 | 0.96 |
| Peptidyl-prolyl cis-trans isomerase A                                      | P17742 | 0.02 | 0.02 | 0.97 |
| Acyl-CoA-binding protein (diazepam-binding inhibitor)                      | P31786 | 0.02 | 0.02 | 0.96 |
| Phosphatidylethanolamine-binding protein 1 (PEBP-1)                        | P70296 | 0.02 | 0.01 | 0.96 |
| Profilin 1                                                                 | P62962 | 0.02 | 0.02 | 0.97 |
| Dystroglycan precursor (Dystrophin-associated glycoprotein 1)              | Q62048 | 0.02 | 0.02 | 0.96 |
| Heterogeneous nuclear ribonucleoprotein A2/B1                              | O88569 | 0.02 | 0.02 | 0.97 |
| Tubulin, alpha                                                             | P05213 | 0.02 | 0.02 | 0.97 |
| Annexin A2                                                                 | P07356 | 0.02 | 0.02 | 0.97 |
| Eukaryotic initiation factor 4AII                                          | P10630 | 0.02 | 0.03 | 0.96 |
| Lactate dehydrogenase 2, B chain                                           | P16125 | 0.02 | 0.01 | 0.96 |
| Spectrin alpha 2                                                           | P16546 | 0.02 | 0.02 | 0.96 |
| Fatty acid synthase                                                        | P19096 | 0.02 | 0.02 | 0.96 |

|                                                                   |        |      |      |      |
|-------------------------------------------------------------------|--------|------|------|------|
| Purine-nucleoside phosphorylase                                   | P23492 | 0.02 | 0.02 | 0.96 |
| Proteasome subunit, beta type 8                                   | P28063 | 0.02 | 0.01 | 0.97 |
| Guanosine diphosphate (GDP) dissociation inhibitor 1              | P50396 | 0.02 | 0.01 | 0.97 |
| Actinin, alpha 4                                                  | P57780 | 0.02 | 0.03 | 0.96 |
| 14-3-3 protein epsilon                                            | P62259 | 0.02 | 0.02 | 0.96 |
| Heat shock 70kDa protein 8 isoform 1                              | P63017 | 0.02 | 0.02 | 0.96 |
| 14-3-3 protein zeta                                               | P63101 | 0.02 | 0.02 | 0.96 |
| 14-3-3 protein theta                                              | P68254 | 0.02 | 0.02 | 0.96 |
| Myosin, light polypeptide 6, alkali, smooth muscle and non-muscle | Q60605 | 0.02 | 0.02 | 0.96 |
| Rab GDP dissociation inhibitor beta                               | Q61598 | 0.02 | 0.01 | 0.97 |
| Vinculin                                                          | Q64727 | 0.02 | 0.02 | 0.97 |
| Actinin, alpha 1                                                  | Q7TPR4 | 0.02 | 0.02 | 0.96 |
| Filamin-B                                                         | Q80X90 | 0.02 | 0.02 | 0.96 |
| Thioredoxin reductase 1                                           | Q8CI31 | 0.02 | 0.02 | 0.96 |
| Aldehyde dehydrogenase 1 family, member L1                        | Q8R0Y6 | 0.02 | 0.01 | 0.97 |
| Ribonuclease/angiogenesis inhibitor                               | Q91VI7 | 0.02 | 0.02 | 0.97 |
| Rho GDP dissociation inhibitor (GDI) alpha                        | Q99PT1 | 0.02 | 0.02 | 0.96 |
| Lactoylglutathione lyase                                          | Q9CPU0 | 0.02 | 0.02 | 0.96 |
| Actin related protein 2/3 complex, subunit 2                      | Q9CVB6 | 0.02 | 0.01 | 0.97 |
| Tubulin, beta                                                     | Q9ERD7 | 0.02 | 0.02 | 0.96 |
| S-phase kinase-associated protein 1A                              | Q9WTX5 | 0.02 | 0.02 | 0.96 |
| Macrophage migration inhibitory factor (MIF)                      | P34884 | 0.01 | 0.02 | 0.97 |
| Peroxiredoxin 1                                                   | A2AP16 | 0.01 | 0.03 | 0.96 |
| Dihydropyrimidinase-like 2                                        | O08553 | 0.01 | 0.03 | 0.96 |
| Proteasome subunit, beta type 1                                   | O09061 | 0.01 | 0.03 | 0.96 |
| Annexin A3                                                        | O35639 | 0.01 | 0.03 | 0.96 |
| Glial fibrillary acidic protein                                   | P03995 | 0.01 | 0.39 | 0.6  |
| Phosphoglycerate kinase 1                                         | P09411 | 0.01 | 0.03 | 0.97 |
| Ferritin heavy chain 1                                            | P09528 | 0.01 | 0.03 | 0.96 |
| Nucleoside-diphosphate kinase 1                                   | P15532 | 0.01 | 0.03 | 0.96 |
| Triosephosphate isomerase 1                                       | P17751 | 0.01 | 0.03 | 0.96 |
| Cofilin 1, non-muscle                                             | P18760 | 0.01 | 0.02 | 0.97 |
| Peroxiredoxin 3                                                   | P20108 | 0.01 | 0.94 | 0.05 |
| Villin 2                                                          | P26040 | 0.01 | 0.02 | 0.97 |
| Transgelin                                                        | P37804 | 0.01 | 0.02 | 0.96 |
| Transketolase                                                     | P40142 | 0.01 | 0.03 | 0.96 |
| Glutathione S-transferase, pi 2                                   | P46425 | 0.01 | 0.02 | 0.97 |
| Annexin A5                                                        | P48036 | 0.01 | 0.03 | 0.96 |
| Fatty acid binding protein 7, brain                               | P51880 | 0.01 | 0.02 | 0.97 |
| Pyruvate kinase isozyme M2                                        | P52480 | 0.01 | 0.02 | 0.96 |
| Eukaryotic translation elongation factor 2                        | P58252 | 0.01 | 0.02 | 0.97 |
| Tropomyosin 1, alpha                                              | P58771 | 0.01 | 0.02 | 0.96 |
| 14-3-3 protein gamma                                              | P61982 | 0.01 | 0.02 | 0.96 |
| Cytochrome c                                                      | P62897 | 0.01 | 0.03 | 0.96 |
| Eukaryotic translation initiation factor 5A                       | P63242 | 0.01 | 0.03 | 0.96 |
| 14-3-3 protein eta                                                | P68510 | 0.01 | 0.02 | 0.97 |
| Proteasome activator PA28 alpha subunit                           | P97371 | 0.01 | 0.03 | 0.96 |
| Nucleoside-diphosphate kinase 2                                   | Q01768 | 0.01 | 0.03 | 0.97 |
| Creatine kinase, brain                                            | Q04447 | 0.01 | 0.03 | 0.96 |

|                                                    |        |      |      |      |
|----------------------------------------------------|--------|------|------|------|
| WD repeat domain 1                                 | Q3TJY2 | 0.01 | 0.02 | 0.96 |
| Proteasome subunit, alpha type 5                   | Q3UPK6 | 0.01 | 0.03 | 0.96 |
| Proteasome subunit, beta type 5                    | Q3UZI1 | 0.01 | 0.03 | 0.96 |
| Aldolase 1, isoform A                              | Q5FWB7 | 0.01 | 0.02 | 0.96 |
| Aldolase 3, isoform C                              | Q5SYM1 | 0.01 | 0.02 | 0.96 |
| Peroxiredoxin 2 (Thioredoxin peroxidase 1)         | Q61171 | 0.01 | 0.02 | 0.96 |
| Spectrin beta 2 isoform 1 or 2                     | Q62261 | 0.01 | 0.02 | 0.96 |
| Clathrin, heavy polypeptide (Hc)                   | Q68FD5 | 0.01 | 0.02 | 0.97 |
| Tropomyosin 4, alpha                               | Q6IRU2 | 0.01 | 0.02 | 0.97 |
| Brain glycogen phosphorylase                       | Q8CI94 | 0.01 | 0.03 | 0.97 |
| Myosin, heavy polypeptide 9, non-muscle isoform 1  | Q8VDD5 | 0.01 | 0.02 | 0.96 |
| Filamin-C                                          | Q8VHX6 | 0.01 | 0.02 | 0.97 |
| Transgelin 2                                       | Q91VU2 | 0.01 | 0.03 | 0.96 |
| UDP-glucose pyrophosphorylase 2                    | Q91ZJ5 | 0.01 | 0.03 | 0.96 |
| Transaldolase 1                                    | Q93092 | 0.01 | 0.03 | 0.97 |
| Phosphoserine aminotransferase 1                   | Q99K85 | 0.01 | 0.02 | 0.97 |
| Gelsolin-like capping protein                      | Q99LB4 | 0.01 | 0.02 | 0.96 |
| DJ-1 protein                                       | Q99LX0 | 0.01 | 0.02 | 0.97 |
| 14-3-3 protein beta                                | Q9CQV8 | 0.01 | 0.02 | 0.96 |
| Calponin 3, acidic                                 | Q9DAW9 | 0.01 | 0.03 | 0.96 |
| Phosphoglycerate mutase 1 (brain)                  | Q9DBJ1 | 0.01 | 0.02 | 0.97 |
| Proteasome subunit, alpha type 3                   | Q9DCD8 | 0.01 | 0.02 | 0.96 |
| Aldo-keto reductase family 1, member A4            | Q9JH6  | 0.01 | 0.03 | 0.96 |
| Plectin 1                                          | Q9QXS1 | 0.01 | 0.03 | 0.96 |
| Proteasome subunit, alpha type 1                   | Q9R1P4 | 0.01 | 0.03 | 0.96 |
| Proteasome subunit, alpha type 7                   | Q9Z2U0 | 0.01 | 0.02 | 0.96 |
| Valosin containing protein                         | Q01853 | 0.01 | 0.02 | 0.96 |
| Glucose-6-phosphate isomerase (GPI)                | P06745 | 0    | 0.14 | 0.86 |
| Glutathione S-transferase, mu 1                    | P10649 | 0    | 0.02 | 0.97 |
| Aspartate aminotransferase                         | P05202 | 0    | 0.95 | 0.04 |
| Malic enzyme 1, supernatant                        | P06801 | 0    | 0.03 | 0.97 |
| Malate dehydrogenase 2, NAD (mitochondrial)        | P08249 | 0    | 0.99 | 0.01 |
| Glyceraldehyde-3-phosphate dehydrogenase           | P16858 | 0    | 0.05 | 0.94 |
| Enolase 1, alpha non-neuron                        | P17182 | 0    | 0.03 | 0.96 |
| Ornithine aminotransferase                         | P29758 | 0    | 0.98 | 0.02 |
| Lamin A isoform A                                  | P48678 | 0    | 0.04 | 0.96 |
| Proteasome subunit, alpha type 2                   | P49722 | 0    | 0.04 | 0.95 |
| H4 histone family, member A                        | P62806 | 0    | 0.03 | 0.97 |
| Peroxiredoxin 5 precursor                          | P99029 | 0    | 0.96 | 0.03 |
| Ubiquitin-activating enzyme E1, Chr X              | Q02053 | 0    | 0.03 | 0.97 |
| Leukotriene A4 hydrolase                           | Q3UY71 | 0    | 0.08 | 0.92 |
| Proteasome subunit, beta type 3                    | Q545G0 | 0    | 0.02 | 0.97 |
| Filamin-A                                          | Q8BTM8 | 0    | 0.05 | 0.95 |
| Glyoxalase domain containing 4                     | Q9CPV4 | 0    | 0.98 | 0.01 |
| Dimethylarginine dimethylaminohydrolase 1          | Q9CWS0 | 0    | 0.75 | 0.24 |
| SH3-binding domain glutamic acid-rich protein like | Q9JJU8 | 0    | 0.07 | 0.93 |
| Proteasome subunit, alpha type 6                   | Q9QUM9 | 0    | 0.04 | 0.96 |

Proteins are reported in order of decreasing SP (secretory pathway) score calculated by Protein Prowler version 1.2 (pprowler.imb.uq.edu.au/index.jsp)

- a) Accession numbers are reported from the Uniprot database ([www.uniprot.org](http://www.uniprot.org)) and, when available, refer to the unprocessed precursor protein.
- b) Secretory pathway targeting score (signal peptide)
- c) Mitochondrion targeting score (mitochondrial targeting peptide)
- d) Other targeting score (nucleus, cytoplasm, other)

**Table 3.** Redundant peptides from proteins in the astrocyte secretome.

| Protein Name (Synonym)                                               | Accession <sup>a</sup> | MW<br>(kDa) | 1D      | 1D       | 7D      | 7D       |
|----------------------------------------------------------------------|------------------------|-------------|---------|----------|---------|----------|
|                                                                      |                        |             | Control | Cytokine | Control | Cytokine |
| <b><i>Extracellular Matrix and Adhesion</i></b>                      |                        |             |         |          |         |          |
| Agrin                                                                | A2ASQ0                 | 205.0       | 8       | 46       | 10      | 60       |
| Cadherin-2 precursor (Neural-cadherin)                               | P15116                 | 99.8        | 19      | 18       | 43      | 35       |
| Calsyntenin 1                                                        | A2A800                 | 108.9       | 18      | 9        | 29      | 15       |
| Collagen alpha-1(I) chain precursor                                  | P11087                 | 138.0       | 3       | 7        | 26      | 11       |
| Collagen alpha-1(IV) chain precursor                                 | P02463                 | 160.7       | -       | -        | 2       | 4        |
| *Collagen alpha-1(VI) chain precursor                                | Q04857                 | 108.5       | -       | 2        | -       | 5        |
| ^Collagen alpha-1(XI) chain precursor                                | Q61245                 | 181.0       | -       | -        | 5       | -        |
| Collagen alpha-1(XII) chain precursor                                | Q60847                 | 340.2       | 4       | 21       | 85      | 52       |
| Collagen alpha-2(I) chain precursor                                  | Q01149                 | 129.6       | -       | 2        | 10      | 8        |
| Collagen alpha-2(V) chain precursor                                  | Q3U962                 | 145.0       | 4       | 15       | 24      | 11       |
| EGF-containing fibulin-like extracellular matrix protein 2           | Q9JM06                 | 49.5        | 4       | 8        | 29      | 8        |
| Extracellular matrix protein                                         | Q9QX30                 | 62.8        | -       | -        | 15      | 8        |
| Fat 1 cadherin                                                       | Q9QXA3                 | 506.0       | -       | -        | 13      | 7        |
| Fibromodulin precursor (FM)                                          | P50608                 | 43.1        | 6       | 9        | 21      | 10       |
| Fibronectin 1                                                        | Q3UGY5                 | 262.8       | 146     | 238      | 375     | 355      |
| Fibulin-5 precursor (FIBL-5)                                         | Q9WVH9                 | 50.2        | 7       | 2        | 25      | 3        |
| Galectin-3 (Galactose-specific lectin 3)                             | P16110                 | 27.5        | -       | 2        | 6       | 3        |
| Glypican-4 precursor (K-glypican)                                    | P51655                 | 62.6        | -       | 3        | 11      | 10       |
| *Intercellular adhesion molecule (Icam1)                             | Q922B3                 | 58.9        | -       | -        | -       | 5        |
| *Laminin subunit alpha-4 precursor                                   | P97927                 | 201.8       | -       | -        | -       | 11       |
| Laminin subunit alpha-5 precursor                                    | Q61001                 | 404.0       | -       | 12       | 2       | 46       |
| *Laminin subunit beta-2 precursor (S-laminin)                        | Q61292                 | 196.4       | -       | 10       | -       | 34       |
| Laminin subunit gamma-1 precursor (Laminin B2 chain)                 | P02468                 | 177.3       | -       | 20       | 5       | 46       |
| Legumain                                                             | A2RTI3                 | 49.4        | 6       | 18       | 25      | 15       |
| Lysyl oxidase-like 3                                                 | Q91VN8                 | 83.7        | -       | -        | 4       | 2        |
| Mammalian ependymin related protein-2                                | Q99M71                 | 25.5        | 14      | 21       | 20      | 24       |
| Mimecan precursor (Osteoglycin)                                      | Q62000                 | 34.0        | -       | 4        | 26      | 6        |
| Mini-agrin                                                           | Q5EBX5                 | 103.4       | 2       | 4        | 2       | 5        |
| Neurocan core protein precursor (Chondroitin sulfate proteoglycan 3) | P55066                 | 137.2       | 24      | 27       | 31      | 14       |
| Nidogen 2 protein                                                    | Q8R5G0                 | 153.9       | 4       | -        | 13      | 3        |
| Basement membrane-specific heparan sulfate proteoglycan core protein | Q05793                 | 469.0       | 3       | 34       | 32      | 117      |
| SPARC-like protein 1 precursor (Matrix glycoprotein Sc1)             | P70663                 | 72.3        | -       | 5        | 13      | 11       |
| Tenascin precursor (TN-C)                                            | Q80YX1                 | 231.8       | 8       | 28       | 11      | 73       |
| Tenascin-N precursor (TN-N)                                          | Q80Z71                 | 173.1       | -       | -        | 5       | 29       |
| Thrombospondin 1                                                     | Q8CGB2                 | 129.7       | -       | 2        | 9       | 21       |
| Vascular cell adhesion protein 1 precursor (CD106 antigen)           | P29533                 | 81.3        | 9       | 5        | 34      | 66       |
| Vitamin K-dependent protein S precursor                              | Q08761                 | 74.9        | -       | -        | 14      | 10       |
| <b><i>Protein Processing and Proteolysis</i></b>                     |                        |             |         |          |         |          |
| 78 kDa glucose-regulated protein precursor                           | P20029                 | 72.4        | 12      | 14       | 15      | 8        |
| Alpha-2-macroglobulin-P precursor (Alpha-2-macroglobulin)            | Q6GQT1                 | 164.3       | 116     | 204      | 301     | 189      |
| Aminopeptidase (Plasma glutamate carboxypeptidase)                   | Q9WVJ3                 | 51.8        | 9       | 11       | 19      | 9        |
| Aminopeptidase puromycin sensitive                                   | Q5PR74                 | 103.3       | 2       | 9        | 4       | -        |
| Bone morphogenetic protein 1                                         | Q6N2M2                 | 111.7       | 2       | 4        | 5       | 4        |
| Calreticulin precursor                                               | P14211                 | 48.0        | 5       | 3        | 4       | -        |

|                                                       |        |       |    |     |     |     |
|-------------------------------------------------------|--------|-------|----|-----|-----|-----|
| Carboxypeptidase E precursor                          | Q00493 | 53.3  | 27 | 41  | 90  | 71  |
| Cathepsin B precursor                                 | P10605 | 37.3  | 47 | 71  | 131 | 136 |
| Cathepsin D precursor                                 | P18242 | 45.0  | 21 | 28  | 79  | 69  |
| Cathepsin L precursor                                 | P06797 | 37.5  | 17 | 9   | 28  | 39  |
| Cathepsin S precursor                                 | O70370 | 38.4  | -  | -   | 26  | 15  |
| Cathepsin Z precursor                                 | Q9WUU7 | 34.0  | 5  | 6   | 13  | 15  |
| Cystatin-C precursor (Cystatin-3)                     | P21460 | 15.5  | 77 | 109 | 232 | 287 |
| Dipeptidyl-peptidase 1 precursor (Cathepsin C)        | P97821 | 52.4  | -  | 4   | 2   | 5   |
| Dipeptidyl-peptidase 2 precursor                      | Q9ET22 | 56.3  | 3  | 6   | -   | 3   |
| ^Endoplasmic reticulum protein ERp29 precursor        | P57759 | 28.8  | -  | -   | 3   | -   |
| Endoplasmic precursor (GRP94)                         | P08113 | 92.5  | 4  | 3   | 9   | 2   |
| Glia-derived nexin precursor (Serpine 2)              | Q07235 | 44.2  | -  | 15  | 14  | 29  |
| ^Inter-alpha-trypsin inhibitor heavy chain H3         | Q61704 | 99.0  | -  | -   | 11  | -   |
| Inter-alpha-trypsin inhibitor heavy chain H5          | Q8BJD1 | 106.7 | -  | -   | 3   | 11  |
| Lysosomal protective protein precursor                | P16675 | 53.8  | -  | 8   | 14  | 16  |
| Metalloproteinase inhibitor 2 precursor (TIMP-2)      | P25785 | 24.3  | 9  | 23  | 22  | 19  |
| Peptidyl-prolyl cis-trans isomerase A                 | P17742 | 18.0  | 9  | 6   | 15  | 11  |
| Peptidyl-prolyl cis-trans isomerase B                 | P24369 | 22.7  | 9  | 14  | 11  | 10  |
| Protein disulfide-isomerase A3 precursor              | P27773 | 56.7  | 14 | 24  | 22  | 9   |
| Protein disulfide-isomerase A4 precursor              | P08003 | 72.0  | -  | 3   | 10  | 2   |
| ^Protein disulfide-isomerase A6 precursor             | Q922R8 | 48.1  | -  | -   | 4   | -   |
| Protein disulfide-isomerase precursor (PDI)           | P09103 | 57.1  | 4  | 6   | 7   | -   |
| Pigment epithelium-derived factor (PEDF)              | P97298 | 46.2  | 57 | 59  | 61  | 57  |
| Plasma protease C1 inhibitor                          | P97290 | 55.6  | 7  | 3   | 40  | 73  |
| Plasminogen activator inhibitor 1                     | P22777 | 45.0  | -  | 12  | 5   | 17  |
| Serine protease inhibitor A3N precursor (Serpine A3N) | Q91WP6 | 46.7  | 12 | 30  | 43  | 51  |
| *Stromelysin-1 precursor (MMP-3)                      | P28862 | 53.8  | -  | 3   | -   | 14  |
| Sulfhydryl oxidase 1 precursor (Quiescin Q6)          | Q8BND5 | 82.8  | -  | -   | 23  | 7   |
| Tripeptidyl-peptidase 1 precursor                     | O89023 | 61.3  | -  | -   | 4   | 7   |

### ***Metabolism***

|                                                                  |        |       |    |    |    |     |
|------------------------------------------------------------------|--------|-------|----|----|----|-----|
| Acid ceramidase precursor (Acylsphingosine deacylase)            | Q9WV54 | 44.7  | -  | -  | 8  | 15  |
| Alpha-N-acetylglucosaminidase                                    | O88325 | 82.6  | -  | -  | 4  | 5   |
| Aspartate aminotransferase                                       | P05202 | 47.4  | 6  | 5  | 5  | 2   |
| ^Beta-1,3-N-acetylglucosaminyltransferase lunatic fringe         | O09010 | 42.0  | -  | -  | 7  | -   |
| ^Beta-glucuronidase precursor                                    | P12265 | 74.2  | -  | -  | 6  | -   |
| Beta-hexosaminidase alpha chain precursor (Hexosaminidase A)     | P29416 | 60.6  | -  | -  | 6  | 3   |
| Beta-hexosaminidase beta chain precursor (Hexosaminidase B)      | P20060 | 61.1  | 8  | 3  | 27 | 6   |
| ^Bifunctional heparan sulfate N-deacetylase/N-sulfotransferase 1 | Q3UHN9 | 100.7 | -  | -  | 3  | -   |
| Chitinase-3-like protein 1 precursor (Cartilage glycoprotein 39) | Q61362 | 43.0  | 9  | 75 | 42 | 130 |
| Epididymis-specific alpha-mannosidase precursor                  | O54782 | 115.6 | 2  | 2  | 16 | 9   |
| Exostosin-2                                                      | P70428 | 82.1  | -  | -  | 5  | 2   |
| Galactocerebrosidase precursor (GALCERase)                       | P54818 | 75.5  | -  | -  | 6  | 3   |
| Gamma-glutamyl hydrolase                                         | Q9Z0L8 | 35.4  | 2  | 2  | 8  | 5   |
| Ganglioside GM2 activator precursor                              | Q60648 | 20.8  | 3  | 9  | 12 | 10  |
| Glucose-6-phosphate isomerase (GPI)                              | P06745 | 62.8  | 18 | 15 | 15 | 6   |
| *Lysosomal alpha-glucosidase precursor (Acid maltase)            | P70699 | 106.2 | -  | -  | -  | 11  |
| N-acetylglucosamine-6-sulfatase precursor (G6S)                  | Q8BFR4 | 61.2  | -  | 7  | 7  | 6   |
| ^N-acetylglucosaminide beta-1,3-N-acetylglucosaminyltransferase  | Q8BWP8 | 47.4  | -  | -  | 7  | -   |
| N(4)-(beta-N-acetylglucosaminyl)-L-asparaginase                  | Q64191 | 37.0  | -  | 8  | 5  | 10  |

|                                                                          |        |      |   |   |    |    |
|--------------------------------------------------------------------------|--------|------|---|---|----|----|
| Palmitoyl-protein thioesterase 1 precursor (PPT-1)                       | O88531 | 34.5 | - | - | 11 | 14 |
| Platelet-activating factor acetylhydrolase                               | Q60963 | 49.2 | - | 2 | 29 | 3  |
| Procollagen-lysine, 2-oxoglutarate 5-dioxygenase 1 (Lysyl hydroxylase 1) | Q9R0E2 | 83.6 | 4 | 6 | 24 | 10 |
| Procollagen-lysine, 2-oxoglutarate 5-dioxygenase 2 (Lysyl hydroxylase 2) | Q9R0B9 | 84.5 | - | 5 | 8  | 4  |
| Procollagen-lysine, 2-oxoglutarate 5-dioxygenase 3 (Lysyl hydroxylase 3) | Q9R0E1 | 84.9 | - | - | 15 | 11 |
| Putative phospholipase B-like 2 precursor                                | Q3TCN2 | 66.7 | - | 3 | 10 | 2  |
| Ribonuclease T2 isoform 1                                                | Q9CQ01 | 29.6 | 2 | - | 6  | 9  |

### ***Immune***

|                                                                    |        |       |    |     |     |      |
|--------------------------------------------------------------------|--------|-------|----|-----|-----|------|
| Beta-2-microglobulin precursor                                     | P01887 | 13.8  | 5  | 24  | 24  | 56   |
| ^Cell adhesion molecule 4 precursor                                | Q8R464 | 42.7  | -  | -   | 6   | -    |
| *Chemokine (C-C motif) ligand 7                                    | Q03366 | 11.0  | -  | -   | -   | 11   |
| *Chemokine (C-C motif) ligand 8                                    | Q9Z121 | 11.0  | -  | -   | -   | 3    |
| *Chemokine (C-X3-C motif) ligand 1 (Fractalkine)                   | O35188 | 42.1  | -  | -   | -   | 9    |
| *Chemokine (C-X-C motif) ligand 1 (Growth-regulated alpha protein) | P12850 | 10.3  | -  | 6   | -   | 15   |
| Complement C1q subcomponent subunit B precursor                    | P14106 | 26.7  | -  | -   | 4   | 5    |
| Complement C1q tumor necrosis factor-related protein 5 precursor   | Q8K479 | 25.4  | 4  | 8   | 7   | 11   |
| Complement C3 precursor                                            | P01027 | 186.5 | 95 | 575 | 484 | 2036 |
| Complement C4-B precursor                                          | P01029 | 192.9 | 18 | 14  | 156 | 112  |
| Complement C1q subcomponent subunit C precursor                    | Q02105 | 26.0  | -  | -   | 7   | 5    |
| Complement C1r-A subcomponent                                      | Q8CG16 | 80.1  | -  | 10  | 23  | 67   |
| Complement C1s-A subcomponent                                      | Q8CG14 | 77.4  | -  | -   | 18  | 132  |
| Complement factor B precursor                                      | P04186 | 85.0  | -  | -   | 5   | 41   |
| Cyclophilin C-associated protein                                   | O35649 | 64.1  | 5  | -   | 20  | 43   |
| H-2 class I histocompatibility antigen, D-B alpha chain precursor  | P01899 | 40.8  | -  | 5   | 6   | 13   |
| H-2 class I histocompatibility antigen, Q8 alpha chain             | P14430 | 37.5  | -  | 13  | 6   | 22   |
| Immunoglobulin superfamily containing leucine-rich repeat          | Q6GU68 | 45.6  | 2  | 7   | 7   | 2    |
| Lysozyme C type M precursor                                        | P08905 | 16.7  | -  | -   | 45  | 66   |
| Macrophage colony-stimulating factor 1 precursor (CSF-1)           | P07141 | 60.6  | -  | 41  | 39  | 90   |
| ^Macrophage colony-stimulating factor 1 receptor                   | P09581 | 109.3 | -  | -   | 4   | -    |
| Macrophage migration inhibitory factor (MIF)                       | P34884 | 12.5  | 10 | 8   | 8   | 7    |
| Monocyte differentiation antigen CD14 precursor                    | P10810 | 39.2  | -  | 2   | 21  | 10   |
| Pentraxin-related protein PTX3 precursor                           | P48759 | 41.8  | 6  | 38  | 3   | 34   |
| Platelet-derived growth factor receptor-like protein precursor     | Q6PE55 | 41.9  | -  | 4   | 4   | 7    |

### ***Binding and Transport***

|                                                                    |        |       |    |    |     |     |
|--------------------------------------------------------------------|--------|-------|----|----|-----|-----|
| 45 kDa calcium-binding protein precursor (SDF-4)                   | Q61112 | 42.1  | 2  | 2  | 7   | 6   |
| ^Acyl-CoA-binding protein (DBI)                                    | P31786 | 10.0  | -  | -  | 4   | -   |
| *Adipocyte enhancer-binding protein                                | Q640N1 | 128.4 | -  | -  | -   | 12  |
| Annexin A2                                                         | P07356 | 38.7  | 9  | 2  | 13  | -   |
| Apolipoprotein E precursor (Apo-E)                                 | P08226 | 35.9  | 64 | 7  | 177 | 128 |
| ^Biotinidase precursor                                             | Q8CIF4 | 58.6  | -  | -  | 4   | -   |
| Ceruloplasmin                                                      | Q61147 | 121.2 | 19 | 97 | 64  | 300 |
| Dystroglycan precursor (Dystrophin-associated glycoprotein 1)      | Q62165 | 96.9  | 10 | 7  | 26  | 21  |
| Follistatin-related protein 1 precursor                            | Q62356 | 34.6  | 11 | 29 | 16  | 31  |
| Gelsolin precursor (Actin-depolymerizing factor)                   | P13020 | 85.9  | 6  | -  | 18  | 3   |
| Rab GDP dissociation inhibitor beta                                | Q61598 | 50.5  | 9  | 11 | 20  | 3   |
| Lipopolysaccharide binding protein                                 | A2AC66 | 53.1  | -  | 10 | 10  | 15  |
| *Lysosomal-associated membrane glycoprotein 1 (LAMP1)              | P11438 | 43.9  | -  | -  | -   | 7   |
| Neutrophil gelatinase-associated lipocalin precursor (Lipocalin 2) | P11672 | 22.9  | -  | 33 | 25  | 283 |
| Nucleobindin-1 precursor (CALNUC)                                  | Q02819 | 53.4  | 2  | 18 | 8   | 8   |



|                                                                         |        |       |     |     |     |     |
|-------------------------------------------------------------------------|--------|-------|-----|-----|-----|-----|
| Phosphatidylethanolamine-binding protein 1 (PEBP-1)                     | P70296 | 20.8  | 11  | 20  | 17  | 14  |
| Phospholipid transfer protein precursor (Lipid transfer protein II)     | P55065 | 54.5  | 4   | -   | 78  | 31  |
| Renin receptor precursor                                                | Q9CYN9 | 39.1  | -   | -   | 2   | 6   |
| SPARC precursor                                                         | P07214 | 34.3  | 126 | 73  | 82  | 61  |
| Serotransferrin precursor (Transferrin)                                 | Q92111 | 76.7  | -   | -   | 15  | 3   |
| <sup>^</sup> Sortilin-related receptor, LDLR class A repeats-containing | O88307 | 247.1 | -   | -   | 3   | -   |
| Sulfated glycoprotein 1 precursor (Prosaposin)                          | Q61207 | 61.4  | 2   | 7   | 35  | 48  |
| Superoxide dismutase, extracellular                                     | O09164 | 27.4  | -   | -   | 8   | 20  |
| Transcobalamin-2 precursor                                              | O88968 | 47.6  | 11  | 11  | 33  | 24  |
| Vacuolar ATP synthase subunit S1 precursor                              | Q9R1Q9 | 51.0  | -   | 9   | 9   | 16  |
| Vesicular integral-membrane protein VIP36 precursor                     | Q9DBH5 | 40.4  | -   | -   | 4   | 5   |
| <b><i>Cell Growth &amp; Maintenance</i></b>                             |        |       |     |     |     |     |
| Epididymal secretory protein E1 precursor                               | Q9Z0J0 | 16.4  | 5   | 13  | 14  | 21  |
| Growth-arrest-specific protein 6 precursor (GAS-6)                      | Q61592 | 74.6  | -   | -   | 11  | 7   |
| Insulin-like growth factor binding protein 2                            | P47877 | 32.8  | 32  | 17  | 86  | 98  |
| Insulin-like growth factor binding protein 3                            | P47878 | 31.7  | -   | 5   | 6   | 5   |
| Insulin-like growth factor binding protein 7                            | Q61581 | 28.9  | -   | 7   | 11  | 71  |
| Insulin-like growth factor-binding protein 5                            | Q07079 | 30.4  | 8   | 8   | 20  | 21  |
| Prolow-density lipoprotein receptor-related protein 1 precursor (A2MR)  | Q91ZX7 | 504.7 | -   | -   | 4   | 8   |
| <sup>^</sup> Plexin domain-containing protein 2 precursor               | Q9DC11 | 59.6  | -   | -   | 4   | -   |
| Ptprz1 protein (DSD-1 Proteoglycan)                                     | B2RXS8 | 175.2 | 7   | 5   | 33  | 9   |
| <b><i>Other</i></b>                                                     |        |       |     |     |     |     |
| 4632419I22Rik protein                                                   | Q6NXM5 | 31.9  | -   | -   | 6   | 3   |
| Acid sphingomyelinase-like phosphodiesterase 3a precursor               | P70158 | 49.9  | -   | -   | 4   | 2   |
| Amyloid beta A4 protein precursor (APP)                                 | P12023 | 86.7  | 4   | 11  | 25  | 28  |
| CD109 antigen homolog precursor                                         | Q8R422 | 161.7 | -   | 5   | 19  | 3   |
| Clusterin precursor (Apolipoprotein J)                                  | Q06890 | 51.7  | 20  | 14  | 119 | 154 |
| <sup>^</sup> Meteorin, glial cell differentiation regulator-like        | Q8VE43 | 34.5  | -   | -   | 4   | -   |
| Peroxiredoxin 3                                                         | P20108 | 28.1  | -   | -   | 6   | 9   |
| Profilin 1                                                              | P62962 | 11.8  | 16  | 19  | 19  | 14  |
| Retinoic acid receptor responder protein 2 precursor                    | Q9DD06 | 18.4  | -   | -   | 4   | 12  |
| Secretogranin 3                                                         | P47867 | 53.3  | 2   | 2   | 32  | 6   |
| Vimentin                                                                | P20152 | 53.7  | 77  | 132 | 172 | 108 |

Proteins are organized by functional category and reported with their corresponding accession number, molecular weight (MW), and redundant peptides identified for each treatment condition.

a) Accession numbers are reported from the Uniprot database ([www.uniprot.org](http://www.uniprot.org)) and, when available, refer to the unprocessed precursor protein.

b) The average numbers of redundant peptides identified are reported for protein identifications that passed the selection criteria as detailed in the Experimental Procedures. A null value indicates the protein did not meet the minimum criteria for identification.

<sup>^</sup>Protein was exclusively detected under control conditions.

\*Protein was exclusively detected under cytokine-treated conditions.

**Table 4.** Redundant peptides from unclassified proteins after computational analysis

| Protein Name (Synonym)                           | Accession <sup>a</sup> | MW (kDa) | 1D      | 1D       | 7D      | 7D       |
|--------------------------------------------------|------------------------|----------|---------|----------|---------|----------|
|                                                  |                        |          | Control | Cytokine | Control | Cytokine |
| Redundant Peptides <sup>b</sup>                  |                        |          |         |          |         |          |
| 14-3-3 protein beta                              | Q9CQV8                 | 28,086   | 8       | 8        | 13      | 8        |
| 14-3-3 protein epsilon                           | P62259                 | 29,174   | 29      | 39       | 41      | 24       |
| 14-3-3 protein eta                               | P68510                 | 28,212   | 6       | 5        | -       | 3        |
| 14-3-3 protein gamma                             | P61982                 | 28,303   | 10      | 12       | 14      | 9        |
| 14-3-3 protein theta                             | P68254                 | 27,778   | 4       | 10       | 14      | 5        |
| 14-3-3 protein zeta                              | P63101                 | 27,771   | 16      | 35       | 25      | 19       |
| Actin related protein 2/3 complex, subunit 2     | Q9CVB6                 | 34,357   | 2       | 4        | 4       | 4        |
| Actinin, alpha 1                                 | Q7TPR4                 | 103,068  | 50      | 53       | 104     | 14       |
| Actinin, alpha 4                                 | P57780                 | 104,977  | 8       | 88       | 29      | 23       |
| Aldehyde dehydrogenase 1 family, member L1       | Q8R0Y6                 | 98,709   | -       | 4        | 4       | -        |
| Aldo-keto reductase family 1, member A4          | Q9JII6                 | 36,587   | 6       | 6        | 3       | 5        |
| Aldolase 1, isoform A                            | Q5FWB7                 | 39,356   | 12      | 17       | 27      | 10       |
| Aldolase 3, isoform C                            | Q5SYM1                 | 39,395   | 4       | 24       | 4       | 8        |
| Annexin A3                                       | O35639                 | 36,371   | 3       | -        | 10      | -        |
| Annexin A5                                       | P48036                 | 35,752   | 12      | 5        | 12      | 2        |
| Asparaginase like 1                              | Q8C0M9                 | 33,950   | 6       | 7        | 5       | -        |
| Astrocytic phosphoprotein PEA-15                 | Q62048                 | 15,054   | -       | 11       | 5       | 6        |
| Brain glycogen phosphorylase                     | Q8C194                 | 96,730   | -       | 3        | 5       | -        |
| Calponin 3, acidic                               | Q9DAW9                 | 36,429   | -       | -        | 2       | 2        |
| Clathrin, heavy polypeptide (Hc)                 | Q68FD5                 | 191,557  | 4       | 16       | 8       | 4        |
| Cofilin 1, non-muscle                            | P18760                 | 18,560   | -       | 7        | 8       | 7        |
| Creatine kinase, brain                           | Q04447                 | 42,713   | 25      | 44       | 74      | 38       |
| Cytochrome c                                     | P62897                 | 11,605   | 7       | 4        | 4       | 2        |
| Dihydropyrimidinase-like 2                       | O08553                 | 62,278   | 23      | 21       | 25      | 8        |
| Dimethylarginine dimethylaminohydrolase 1        | Q9CWS0                 | 31,381   | 6       | 9        | 4       | 2        |
| DJ-1 protein                                     | Q99LX0                 | 20,021   | 2       | 5        | 7       | 3        |
| Enolase 1, alpha non-neuron                      | P17182                 | 47,141   | 11      | 20       | 17      | 11       |
| Eukaryotic initiation factor 4AII                | P10630                 | 46,402   | -       | 3        | 6       | 4        |
| Eukaryotic translation elongation factor 2       | P58252                 | 95,314   | 4       | 8        | 11      | 4        |
| Eukaryotic translation initiation factor 5A      | P63242                 | 16,303   | -       | 2        | 3       | 3        |
| Fatty acid binding protein 7, brain              | P51880                 | 14,893   | 6       | 8        | 10      | 5        |
| Fatty acid synthase                              | P19096                 | 272,428  | -       | 6        | 4       | 2        |
| Ferritin heavy chain 1                           | P09528                 | 21,067   | -       | 6        | 9       | 17       |
| Ferritin light chain 1                           | P29391                 | 20,802   | 5       | 2        | 11      | 19       |
| Filamin-A                                        | Q8BTM8                 | 281,194  | 16      | 67       | 66      | 28       |
| Filamin-B                                        | Q80X90                 | 277,753  | 28      | 66       | 86      | 55       |
| Filamin-C                                        | Q8VHX6                 | 291,119  | -       | -        | 11      | 2        |
| Gelsolin-like capping protein                    | Q99LB4                 | 38,769   | -       | -        | 5       | 4        |
| Glial fibrillary acidic protein (GFAP)           | P03995                 | 46,492   | 38      | 40       | 73      | 42       |
| Glutathione S-transferase, alpha 4               | P24472                 | 25,564   | 9       | 4        | 9       | 5        |
| Glutathione S-transferase, mu 1                  | A2AE90                 | 25,970   | 48      | 44       | 61      | 38       |
| Glutathione S-transferase, mu 5                  | P48774                 | 26,635   | -       | 3        | 6       | -        |
| Glutathione S-transferase, pi 2                  | P46425                 | 23,537   | -       | -        | 8       | 7        |
| Glyceraldehyde-3-phosphate dehydrogenase (GAPDH) | P16858                 | 35,810   | -       | -        | 2       | 7        |
| Glyoxalase domain containing 4                   | Q9CPV4                 | 33,317   | -       | -        | 9       | -        |

|                                                                   |        |         |    |    |    |    |
|-------------------------------------------------------------------|--------|---------|----|----|----|----|
| Guanosine diphosphate (GDP) dissociation inhibitor 1              | P50396 | 50,522  | 2  | 3  | 6  | -  |
| H4 histone family, member A                                       | P62806 | 11,367  | 5  | 12 | 5  | 6  |
| Heat shock 70kDa protein 8 isoform 1                              | P63017 | 70,871  | 10 | 22 | 30 | 8  |
| Heat shock protein 4                                              | Q5NCS5 | 94,209  | 6  | 7  | 10 | -  |
| Heat shock protein 90kDa alpha (cytosolic), class A member 1      | P07901 | 84,788  | 13 | 12 | 30 | 8  |
| Heat shock protein 90kDa alpha (cytosolic), class B member 1      | Q71LX8 | 83,281  | 13 | 34 | 10 | 5  |
| Heterogeneous nuclear ribonucleoprotein A2/B1                     | O88569 | 37,403  | -  | 7  | 8  | 8  |
| Hypoxanthine guanine phosphoribosyl transferase 1                 | P00493 | 24,570  | -  | -  | 3  | -  |
| Inositol monophosphatase                                          | O55023 | 30,436  | 4  | 4  | 3  | -  |
| Isocitrate dehydrogenase [NADP] cytoplasmic                       | O88844 | 46,660  | 3  | 3  | 5  | -  |
| Lactate dehydrogenase 1, A chain                                  | P06151 | 36,499  | 15 | 11 | 14 | 15 |
| Lactate dehydrogenase 2, B chain                                  | P16125 | 36,572  | 38 | 31 | 34 | 14 |
| Lactoylglutathione lyase                                          | Q9CPU0 | 20,810  | -  | 6  | 2  | 2  |
| Lamin A isoform A                                                 | P48678 | 74,238  | -  | -  | 7  | 4  |
| Leukotriene A4 hydrolase                                          | Q3UY71 | 69,051  | 3  | -  | 7  | -  |
| Lysosomal alpha-mannosidase precursor (Mannosidase, alpha B)      | O09159 | 114,604 | 3  | 10 | 26 | 10 |
| Malate dehydrogenase 2, NAD (mitochondrial)                       | P08249 | 35,611  | 25 | 24 | 15 | 9  |
| Malate dehydrogenase, cytoplasmic                                 | P14152 | 36,511  | 14 | 6  | 8  | 5  |
| Malic enzyme 1, supernatant                                       | P06801 | 63,999  | -  | -  | 2  | 2  |
| Mannosidase alpha, class 1A, member 1                             | Q544T7 | 73,276  | 2  | 16 | 16 | 13 |
| Myosin, heavy polypeptide 9, non-muscle isoform 1                 | Q8VDD5 | 226,357 | -  | -  | 9  | -  |
| Myosin, light polypeptide 6, alkali, smooth muscle and non-muscle | Q60605 | 16,930  | -  | 5  | 7  | 4  |
| Nestin                                                            | Q6P5H2 | 202,011 | -  | 9  | 5  | -  |
| Nit protein 2                                                     | Q9JHW2 | 30,502  | -  | -  | 2  | -  |
| Nucleoside-diphosphate kinase 1                                   | P15532 | 17,208  | 3  | -  | 6  | 9  |
| Nucleoside-diphosphate kinase 2                                   | Q01768 | 17,363  | 3  | 11 | 3  | 4  |
| Ornithine aminotransferase                                        | P29758 | 48,355  | -  | -  | 3  | 3  |
| Peroxiredoxin 1                                                   | A2AP16 | 22,176  | 14 | 20 | 19 | 24 |
| Peroxiredoxin 2 (Thioredoxin peroxidase 1)                        | Q61171 | 21,779  | 7  | 14 | 14 | 12 |
| Peroxiredoxin 5 precursor                                         | P99029 | 21,897  | -  | 9  | 8  | 20 |
| Peroxiredoxin 6 (Acidic calcium-independent phospholipase A2)     | O08709 | 24,871  | 38 | 48 | 35 | 19 |
| Phosphogluconate dehydrogenase                                    | Q91V28 | 53,261  | 9  | 13 | 10 | 4  |
| Phosphoglycerate kinase 1                                         | P09411 | 44,536  | 22 | 18 | 13 | 12 |
| Phosphoglycerate mutase 1 (brain)                                 | Q9DBJ1 | 28,832  | 3  | 6  | 12 | 9  |
| Phosphoserine aminotransferase 1                                  | Q99K85 | 40,473  | 8  | -  | 2  | -  |
| Plectin 1                                                         | Q9QXS1 | 534,216 | -  | -  | 7  | -  |
| Proteasome activator PA28 alpha subunit                           | P97371 | 28,673  | -  | -  | 4  | 4  |
| Proteasome subunit, alpha type 1                                  | Q9R1P4 | 29,547  | 7  | 4  | 4  | -  |
| Proteasome subunit, alpha type 2                                  | P49722 | 25,926  | -  | 2  | 6  | -  |
| Proteasome subunit, alpha type 3                                  | Q9DCD8 | 28,490  | 9  | 3  | 2  | -  |
| Proteasome subunit, alpha type 5                                  | Q3UPK6 | 26,411  | 4  | 3  | 5  | -  |
| Proteasome subunit, alpha type 6                                  | Q9QUM9 | 27,372  | 4  | 8  | 4  | 4  |
| Proteasome subunit, alpha type 7                                  | Q9Z2U0 | 27,855  | 10 | 8  | 8  | 7  |
| Proteasome subunit, beta type 1                                   | O09061 | 26,372  | 8  | -  | 7  | -  |
| Proteasome subunit, beta type 3                                   | Q545G0 | 22,965  | 4  | 6  | 7  | -  |
| Proteasome subunit, beta type 5                                   | Q3UZI1 | 28,532  | 6  | 11 | 7  | -  |
| Proteasome subunit, beta type 8                                   | P28063 | 30,260  | 2  | 4  | 5  | -  |
| Purine-nucleoside phosphorylase                                   | P23492 | 32,277  | 5  | -  | 7  | 4  |

|                                                                        |        |         |    |    |    |    |
|------------------------------------------------------------------------|--------|---------|----|----|----|----|
| Pyruvate kinase isozyme M2                                             | P52480 | 57,887  | 4  | 7  | 17 | 12 |
| Rho GDP dissociation inhibitor (GDI) alpha                             | Q99PT1 | 23,407  | 8  | 8  | 13 | 14 |
| Ribonuclease/angiogenesis inhibitor                                    | Q91VI7 | 49,816  | 6  | -  | 3  | 3  |
| S-adenosylhomocysteine hydrolase                                       | Q5M9P0 | 47,674  | 3  | -  | 3  | -  |
| SH3-binding domain glutamic acid-rich protein like                     | Q9JJU8 | 12,811  | 3  | 4  | 5  | 5  |
| Soluble calcium-activated nucleotidase 1                               | Q8VCF1 | 45,653  | 2  | 4  | 5  | 4  |
| Spectrin alpha 2                                                       | P16546 | 284,597 | -  | 3  | 18 | -  |
| Spectrin beta 2 isoform 1 or 2                                         | Q62261 | 274,223 | -  | 2  | 5  | -  |
| S-phase kinase-associated protein 1A                                   | Q9WTX5 | 18,672  | -  | 5  | 4  | 3  |
| Superoxide dismutase 1, soluble                                        | P08228 | 15,943  | 18 | 30 | 15 | 27 |
| Thioredoxin reductase 1                                                | Q8CI31 | 54,337  | 6  | 5  | 2  | -  |
| Transaldolase 1                                                        | Q93092 | 37,387  | 6  | -  | 3  | -  |
| Transgelin                                                             | P37804 | 22,576  | 9  | 15 | 18 | 13 |
| Transgelin 2                                                           | Q91VU2 | 22,395  | 4  | 11 | 12 | 10 |
| Transitional endoplasmic reticulum ATPase (valosin-containing protein) | Q01853 | 89,364  | 27 | 57 | 31 | 5  |
| Transketolase                                                          | P40142 | 67,630  | -  | -  | 4  | -  |
| Translin                                                               | Q62348 | 26,201  | 3  | -  | 7  | 3  |
| Triosephosphate isomerase 1                                            | P17751 | 26,713  | 9  | 6  | 6  | 3  |
| Tropomyosin 1, alpha                                                   | P58771 | 32,681  | 7  | 11 | 7  | 4  |
| Tropomyosin 4, alpha                                                   | Q6IRU2 | 28,468  | 8  | 4  | 14 | 6  |
| Tubulin, alpha                                                         | P05213 | 50,152  | -  | 7  | 8  | 2  |
| Tubulin, beta                                                          | Q9ERD7 | 50,419  | -  | 5  | 7  | -  |
| Ubiquitin carboxy-terminal hydrolase L1                                | Q9R0P9 | 24,838  | 2  | 6  | 6  | 2  |
| Ubiquitin-activating enzyme E1, Chr X                                  | Q02053 | 117,809 | -  | 4  | 4  | 2  |
| UDP-glucose pyrophosphorylase 2                                        | Q91ZJ5 | 56,979  | 3  | 4  | 3  | -  |
| Villin 2                                                               | P26040 | 69,407  | -  | -  | 8  | 6  |
| Vinculin                                                               | Q64727 | 116,717 | 14 | 30 | 46 | 8  |
| WD repeat domain 1                                                     | Q3TJY2 | 66,407  | 7  | 6  | 4  | -  |

Proteins are reported with their corresponding accession number, molecular weight (MW), and redundant peptides identified for each treatment condition.

a) Accession numbers are reported from the Uniprot database ([www.uniprot.org](http://www.uniprot.org)) and, when available, refer to the unprocessed precursor protein.

b) The average number of redundant peptides identified after applying the selection criteria detailed in Experimental Procedures. A null value indicates the protein did not meet the minimum criteria for identification.

## Materials and Methods

### Chemicals and Materials

The following primary antibodies were used to detect the mouse protein for Western blot experiments: anti-ApoE (1:1000, Biodesign, Saco, ME), anti-C3 complement (1:500, Cedarlane, Burlington, NC), anti-ceruloplasmin (1:500, BD Biosciences, San Jose, CA), and anti-CXCL1 (1:2500, Abcam, Cambridge, MA). 9-Oxo-10E,12Z-octadecadienoic acid (9-oxo-ODE), 13-oxo-9Z,11E-octadecadienoic acid (13-oxo-ODE), 15-oxo-5Z,8Z,11Z,13E-eicosatetraenoic acid (15-oxo-ETE), 9(R)-hydroxy-10E,12Z-octadecadienoic acid (9(R)-HODE), 9(S)-hydroxy-10E,12Z-octadecadienoic acid (9(S)-HODE), 13(R)-hydroxy-9Z,11E-octadecadienoic acid (13(R)-HODE), 13(S)-hydroxy-9Z,11E-octadecadienoic acid (13(S)-HODE), 11(R)-hydroxy-5Z,8Z,12E,14Z-eicosatetraenoic acid (11(R)-HETE), 11(S)-hydroxy-5Z,8Z,12E,14Z-eicosatetraenoic acid (11(S)-HETE), 12(R)-hydroxy-5Z,8Z,10E,14Z-eicosatetraenoic acid (12(R)-HETE), 12(S)-hydroxy-5Z,8Z,10E,14Z-eicosatetraenoic acid (12(S)-HETE), 15(R)-hydroxy-5Z,8Z,11Z,13E-eicosatetraenoic acid (15(R)-HETE), 15(S)-hydroxy-5Z,8Z,11Z,13E-eicosatetraenoic acid (15(S)-HETE), 9-oxo-11 $\alpha$ ,15S-dihydroxy-prosta-5Z,13E-dien-1-oic acid (PGE<sub>2</sub>), 9-oxo-11 $\beta$ ,15S-dihydroxy-prosta-5Z,13E-dien-1-oic acid (11 $\beta$ -PGE<sub>2</sub>), 9-oxo-11 $\alpha$ ,15S-dihydroxy-(8 $\beta$ )-prosta-5Z,13E-dien-1-oic acid (8-iso-PGE<sub>2</sub>), 9 $\alpha$ ,15S-dihydroxy-11-oxo-prosta-5Z,13E-dien-1-oic acid (PGD<sub>2</sub>), 9 $\alpha$ ,11 $\alpha$ ,15S-trihydroxy-prosta-5Z,13E-dien-1-oic acid (PGF<sub>2 $\alpha$</sub> ), 9 $\alpha$ ,11 $\beta$ ,15S-trihydroxy-prosta-5Z,13E-dien-1-oic acid (11 $\beta$ -PGF<sub>2</sub>), 9 $\alpha$ ,11 $\alpha$ ,15S-trihydroxy-(8 $\beta$ )-prosta-5Z,13E-dien-1-oic acid (8-iso-PGF<sub>2 $\alpha$</sub> ), 9-oxo-11 $\alpha$ ,15S-dihydroxy-prosta-5Z,13E-dien-1-oic-3,3,4,4-<sup>2</sup>H<sub>4</sub> acid ([<sup>2</sup>H<sub>4</sub>]-PGE<sub>2</sub>), 9 $\alpha$ ,11 $\alpha$ ,15S-trihydroxy-prosta-5Z,13E-dien-1-oic-3,3,4,4-<sup>2</sup>H<sub>4</sub> acid ([<sup>2</sup>H<sub>4</sub>]-PGF<sub>2 $\alpha$</sub> ), [<sup>2</sup>H<sub>4</sub>]-13(S)-hydroxy-9Z,11E-octadecadienoic acid ([<sup>2</sup>H<sub>4</sub>]-13(S)-HODE), and [<sup>2</sup>H<sub>8</sub>]-15(S)-hydroxy-5Z,8Z,11Z,13E-eicosatetraenoic acid ([<sup>2</sup>H<sub>8</sub>]-15(S)-HETE), and NS-398, (N-[2-cyclohexyloyl-4-nitrophenyl] methane-sulfonamide) were purchased from Cayman Chemical Co. (Ann Arbor, MI). Diisopropylethylamine (DIPE), 2,3,4,5,6-pentafluorobenzyl bromide (PFB-Br) was purchased from Sigma-Aldrich (St. Louis, MO).

HPLC grade hexane, methanol and isopropanol were obtained from Fisher Scientific Co. (Fair Lawn, NJ). Gases were supplied by BOC Gases (Lebanon, NJ).

### **Nitric oxide metabolite analysis**

Nitric oxide-derived products (nitrate, nitrite, S-nitrosothiols, N-nitroso-, and iron nitrosyl) were quantified by chemical reduction to nitric oxide followed by ozone-based chemiluminescent detection using Nitric Oxide Analyzer 280 (Sievers, Boulder, CO). Briefly, helium gas was bubbled through an acidified (1 N) vanadium (III) chloride solution (50 mM) maintained at 90 °C in a jacketed glass purge vessel. Aliquots (20 µL) of ACM, serum-free media, or nitrite standards were injected into the glass purge vessel. Concentrations of nitric oxide products were calculated using linear best-fit curves constructed against nitrite standards and were reported after correcting for the content of nitric oxide products quantified in serum-free media.

### **Immunohistochemistry and cell morphological analysis**

Astrocyte cultures were fixed with cold methanol for 20 min at –20 °C, followed by 50:50 methanol:acetone for 5 min at –20 °C. Immunodetection of GFAP or Cd11b were performed using a mouse anti-GFAP antibody (1:250, BD Pharmingen, San Jose, CA) or a rat anti-CD11b antibody (1:100, AbD Serotec, Raleigh, NC), respectively. Antigens were visualized with goat anti-mouse secondary antibodies conjugated to either Alexa Fluor 488 or 546 (Invitrogen, Carlsbad, CA). The nuclei were visualized by DAPI staining (1:10,000). Morphological analyses were performed by counting GFAP-positive cells with and without processes from 3-6 fields from at least 3 independent experiments.

### **Targeted lipidomics profile of conditioned media**

Astrocytes were cultured and treated for 7D as described in Materials and Methods. A portion of the ACM filtrate (3 ml) was transferred into a borosilicate glass tube. Tubes containing cell culture media alone (3 ml) were spiked with the following amounts of authentic lipid standards: 20, 50, 100, 200, 500, 1000, 2000 pg. A mixture of internal standards ( $[^2\text{H}_8]$ -5(*S*)-HETE,  $[^2\text{H}_8]$ -12(*S*)-HETE,  $[^2\text{H}_8]$ -15(*S*)-HETE,  $[^2\text{H}_4]$ -9(*S*)-HODE,  $[^2\text{H}_4]$ -13(*S*)-HODE,  $[^2\text{H}_4]$ -PGE<sub>2</sub>,  $[^2\text{H}_4]$ -PGD<sub>2</sub>,  $[^2\text{H}_4]$ -11 $\beta$ -PGF<sub>2</sub>,  $[^2\text{H}_4]$ -PGF<sub>2 $\alpha$</sub> ,  $[^2\text{H}_4]$ -8-*iso*-PGF<sub>2 $\alpha$</sub> -PFB, 1 ng each) was added to each analytical sample and standard solution. The analytical samples and standard solutions were adjusted to pH 3 with 2.5 N hydrochloric acid. Lipids were extracted with diethyl ether (4 ml  $\times$  2) and the organic layer was then evaporated to dryness under nitrogen. The residue was dissolved in 100  $\mu$ L of acetonitrile and treated with 100  $\mu$ L of PFB-Br in acetonitrile (1:19, v/v) followed by 100  $\mu$ L of DIPE in acetonitrile (1:9, v/v). The solution was heated at 60 °C for 60 min, allowed to cool, evaporated to dryness under nitrogen at room temperature, and re-dissolved in 100  $\mu$ L of hexane/ethanol (97:3, v/v). Analysis of the PFB derivatives by normal phase chiral LC-electron capture APCI/MRM/MS analysis was conducted on a 20  $\mu$ L aliquot of this solution along with PFB derivatives of 24 authentic lipids and 10 heavy isotope analog internal standards as described below.

### **Liquid separation and mass spectrometric analysis of lipids**

A Waters Alliance 2690 HPLC system (Waters Corp., Milford, MA) was used for separation of lipids. For the normal phase chiral LC-APCI/MS analysis, a Chiralpak AD-H column (250  $\times$  4.6 mm i.d., 5  $\mu$ m; Chiral Technologies, Inc., West Chester, PA) was employed with a flow rate of 1.0 mL/min. Separations were performed at 30 °C using a linear gradient. Solvent A was hexane and solvent B was methanol/isopropanol (1:1, v/v). The mobile phase gradient was as follows: 2 % B at 0 min, 2 % B at 3 min, 3.6 % B at 11 min, 8 % B at 15 min, 8 % B at 27 min, 50 % B at 30 min, 50 % B at 35 min, and 2 % B at 37 min.

A Finnigan TSQ Quantum Ultra AM mass spectrometer (Thermo Fisher, San Jose, CA) was used for the detection of targeted lipids. The instrument was equipped with an APCI source and operated in the negative ion mode maintaining unit resolution for both parent and product ions during MRM analyses. Operating conditions were as follows: vaporizer temperature was 450 °C, heated capillary temperature was 250 °C, with a discharge current of 30  $\mu$ A applied to the corona needle. Nitrogen was used for the sheath gas, auxiliary gas and ion sweep gas set at 25, 3 and 3 (in arbitrary units), respectively. Collision-induced dissociation (CID) was performed using argon as the collision gas at 1.5 mTorr in the second (rf-only) quadrupole. An additional dc offset voltage was applied to the region of the second multipole ion guide (Q0) at 10 V to impart enough translational kinetic energy to the ions so that solvent adduct ions dissociate to form sample ions.

Targeted chiral LC-electron capture APCI/MRM/MS analysis was conducted using PFB derivatives of 24 lipids and 10 heavy isotope analog internal standards using the following MRM transitions: 9- and 13-oxo-ODE-PFB,  $m/z$  293  $\rightarrow$  113 (collision energy, 21 eV); 15-oxo-ETE-PFB,  $m/z$  317  $\rightarrow$  273 (collision energy, 14 eV); 9(*R*)- and 9(*S*)-HODE-PFB,  $m/z$  295  $\rightarrow$  171 (collision energy, 18 eV); [ $^2\text{H}_4$ ]-9(*S*)-HODE-PFB,  $m/z$  299  $\rightarrow$  172 (collision energy, 18 eV); 13(*R*)- and 13(*S*)-HODE-PFB,  $m/z$  295  $\rightarrow$  195 (collision energy, 18 eV); [ $^2\text{H}_4$ ]-13(*S*)-HODE-PFB,  $m/z$  299  $\rightarrow$  198 (collision energy, 18 eV); 5(*R*)- and 5(*S*)-HETE-PFB,  $m/z$  319  $\rightarrow$  115 (collision energy, 15 eV); [ $^2\text{H}_8$ ]-5(*S*)-HETE-PFB,  $m/z$  327  $\rightarrow$  116 (collision energy, 15 eV); 8(*R*)- and 8(*S*)-HETE-PFB,  $m/z$  319  $\rightarrow$  155 (collision energy, 16 eV); 11(*R*)- and 11(*S*)-HETE-PFB,  $m/z$  319  $\rightarrow$  167 (collision energy, 16 eV); 12(*R*)- and 12(*S*)-HETE-PFB,  $m/z$  319  $\rightarrow$  179 (collision energy, 14 eV); [ $^2\text{H}_8$ ]-12(*S*)-HETE-PFB,  $m/z$  327  $\rightarrow$  184 (collision energy, 14 eV); 15(*R*)- and 15(*S*)-HETE-PFB,  $m/z$  319  $\rightarrow$  219 (collision energy, 13 eV); [ $^2\text{H}_8$ ]-15(*S*)-HETE-PFB,  $m/z$  327  $\rightarrow$  226 (collision energy, 13 eV); PGE<sub>2</sub>-PFB, PGD<sub>2</sub>-PFB, 11 $\beta$ -PGE<sub>2</sub>-PFB, 8-*iso*-PGE<sub>2</sub>-PFB,  $m/z$  351  $\rightarrow$  271 (collision energy, 18 eV); [ $^2\text{H}_4$ ]-PGE<sub>2</sub>-PFB, [ $^2\text{H}_4$ ]-PGD<sub>2</sub>-PFB,  $m/z$  355  $\rightarrow$  275 (collision energy, 18 eV); 11 $\beta$ -PGF<sub>2</sub>-PFB, PGF<sub>2 $\alpha$</sub> -PFB, 8-*iso*-PGF<sub>2 $\alpha$</sub> -PFB,  $m/z$  353  $\rightarrow$  309 (collision energy, 18 eV);



[<sup>2</sup>H<sub>4</sub>]-11β-PGF<sub>2</sub>-PFB, [<sup>2</sup>H<sub>4</sub>]-PGF<sub>2α</sub>-PFB, [<sup>2</sup>H<sub>4</sub>]-8-*iso*-PGF<sub>2α</sub>-PFB, *m/z* 357 → 313 (collision energy, 18 eV).

### **Enzyme-Linked ImmunoSorbent Assay (ELISA)**

The levels of IL-6 were determined by a colorimetric ELISA kit (Pierce, Rockford, IL), and the levels of NGF were measured by Chemikine Sandwich ELISA kit (Chemicon, Billerica, MA), following the manufacturer's instructions. Serum-free media was used for dilution of the standards and unknowns.

### **Western blot analysis**

Protein concentration was measured using the Bradford reagent (Bio-rad, Hercules, CA). ACM protein samples were boiled in Laemmli sample buffer and then separated by either 10 % 1-D SDS-PAGE or 10 % NuPAGE gels. For the analysis of proteins that had increased or decreased abundance as assessed by redundant peptides, equal amounts of protein (between 2-6 μg) were loaded per lane. Detection of these proteins from 1D ACM required samples to be concentrated further by Amicon Microcon Ultracel YM-3 filters (Millipore, Billerica, MA). Following electrophoresis, proteins were transferred to PVDF membranes (Millipore, Billerica, MA) and blocked in TBS containing 0.5% tween (TBS-t) and 5 % milk. Membranes were then incubated in TBS-t containing 5% milk and primary antibody (see Chemicals and Materials). Membranes were then washed in TBS-t, incubated with appropriate secondary antibodies conjugated to Alexa Fluor 680 (1:5000, Invitrogen, Carlsbad, CA) for 1 hour in TBS-t containing 1% milk, and visualized using the Odyssey Infrared Imaging system (Licor Biosciences, Lincoln, NE).

### **Statistical analyses**

Graphs were constructed and statistical analyses were performed using GraphPad Prism 5 (GraphPad Software, Inc., San Diego, CA). Unless otherwise stated, statistical significance was performed by two-tailed unpaired t-test. For data that did not conform to Gaussian distributions, the non-parametric Mann-Whitney test was performed.
